# Supplementary material for: Comparative transcriptomic analysis of thermally stressed Arabidopsis thaliana meiotic recombination mutants
Source: BMC Genomics. 2021 Mar 12;22:181. doi: 10.1186/s12864-021-07497-2 (PMC7953577; doi:10.1186/s12864-021-07497-2)
Supplement: Supplementary file 8 — Additional file 8 : Supplementary Data 1. Enriched GO terms from up- and down-regulated DEGs in WT, mus81 and msh4 after heat stress. [file 12864_2021_7497_MOESM8_ESM.xlsx]

## Sheet: up_GO_BP
Supplementary Data 1 Enriched GO terms from up- and down-regulated DEGs in WT, mus81 and msh4 after heat stress.
	Cluster	ID	Description	GeneRatio	BgRatio	pvalue	p.adjust	qvalue	geneID	Count
1	Col_up	GO:0009451	RNA modification	66/912	354/21845	5.50274e-25	9.05751e-22	8.4105e-22	AT3G58590/AT3G49170/AT3G56330/AT1G06140/AT3G20730/AT3G49740/AT3G61170/AT3G50420/AT1G04840/AT3G23830/AT1G68930/AT1G56690/AT4G14170/AT1G34160/AT5G56310/AT5G40405/AT2G37320/AT3G16610/AT1G25360/AT4G32430/AT2G37310/AT4G08210/AT2G33760/AT4G02750/AT2G22070/AT5G16860/AT3G49142/AT4G35130/AT2G27610/AT5G08490/AT4G14820/AT5G52850/AT4G18840/AT3G14730/AT4G25630/AT2G29760/AT5G61030/AT5G40410/AT5G39350/AT5G13830…	66
2	Col_up	GO:0071456	cellular response to hypoxia	41/912	238/21845	9.61346e-15	5.31712e-12	4.9373e-12	AT4G10250/AT5G20150/AT4G27280/AT5G42050/AT1G35140/AT2G26560/AT1G72430/AT1G73010/AT1G72940/AT5G54960/AT2G41090/AT2G41010/AT4G24570/AT1G59860/AT2G32210/AT2G26150/AT4G24110/AT1G72920/AT5G12030/AT5G47060/AT5G06320/AT1G76650/AT5G35735/AT2G36220/AT1G07400/AT1G07135/AT1G27730/AT5G45630/AT2G14247/AT4G29780/AT5G20790/AT3G56880/AT2G46400/AT5G12020/AT5G45340/AT1G22220/AT5G66650/AT4G10265/AT2G22500/AT5G54490…	41
3	Col_up	GO:0036294	cellular response to decreased oxygen levels	41/912	240/21845	1.29213e-14	5.31712e-12	4.9373e-12	AT4G10250/AT5G20150/AT4G27280/AT5G42050/AT1G35140/AT2G26560/AT1G72430/AT1G73010/AT1G72940/AT5G54960/AT2G41090/AT2G41010/AT4G24570/AT1G59860/AT2G32210/AT2G26150/AT4G24110/AT1G72920/AT5G12030/AT5G47060/AT5G06320/AT1G76650/AT5G35735/AT2G36220/AT1G07400/AT1G07135/AT1G27730/AT5G45630/AT2G14247/AT4G29780/AT5G20790/AT3G56880/AT2G46400/AT5G12020/AT5G45340/AT1G22220/AT5G66650/AT4G10265/AT2G22500/AT5G54490…	41
4	Col_up	GO:0071453	cellular response to oxygen levels	41/912	240/21845	1.29213e-14	5.31712e-12	4.9373e-12	AT4G10250/AT5G20150/AT4G27280/AT5G42050/AT1G35140/AT2G26560/AT1G72430/AT1G73010/AT1G72940/AT5G54960/AT2G41090/AT2G41010/AT4G24570/AT1G59860/AT2G32210/AT2G26150/AT4G24110/AT1G72920/AT5G12030/AT5G47060/AT5G06320/AT1G76650/AT5G35735/AT2G36220/AT1G07400/AT1G07135/AT1G27730/AT5G45630/AT2G14247/AT4G29780/AT5G20790/AT3G56880/AT2G46400/AT5G12020/AT5G45340/AT1G22220/AT5G66650/AT4G10265/AT2G22500/AT5G54490…	41
5	Col_up	GO:0001666	response to hypoxia	41/912	264/21845	3.49769e-13	1.15144e-10	1.06919e-10	AT4G10250/AT5G20150/AT4G27280/AT5G42050/AT1G35140/AT2G26560/AT1G72430/AT1G73010/AT1G72940/AT5G54960/AT2G41090/AT2G41010/AT4G24570/AT1G59860/AT2G32210/AT2G26150/AT4G24110/AT1G72920/AT5G12030/AT5G47060/AT5G06320/AT1G76650/AT5G35735/AT2G36220/AT1G07400/AT1G07135/AT1G27730/AT5G45630/AT2G14247/AT4G29780/AT5G20790/AT3G56880/AT2G46400/AT5G12020/AT5G45340/AT1G22220/AT5G66650/AT4G10265/AT2G22500/AT5G54490…	41
6	Col_up	GO:0036293	response to decreased oxygen levels	41/912	268/21845	5.81627e-13	1.55045e-10	1.4397e-10	AT4G10250/AT5G20150/AT4G27280/AT5G42050/AT1G35140/AT2G26560/AT1G72430/AT1G73010/AT1G72940/AT5G54960/AT2G41090/AT2G41010/AT4G24570/AT1G59860/AT2G32210/AT2G26150/AT4G24110/AT1G72920/AT5G12030/AT5G47060/AT5G06320/AT1G76650/AT5G35735/AT2G36220/AT1G07400/AT1G07135/AT1G27730/AT5G45630/AT2G14247/AT4G29780/AT5G20790/AT3G56880/AT2G46400/AT5G12020/AT5G45340/AT1G22220/AT5G66650/AT4G10265/AT2G22500/AT5G54490…	41
7	Col_up	GO:0070482	response to oxygen levels	41/912	269/21845	6.59365e-13	1.55045e-10	1.4397e-10	AT4G10250/AT5G20150/AT4G27280/AT5G42050/AT1G35140/AT2G26560/AT1G72430/AT1G73010/AT1G72940/AT5G54960/AT2G41090/AT2G41010/AT4G24570/AT1G59860/AT2G32210/AT2G26150/AT4G24110/AT1G72920/AT5G12030/AT5G47060/AT5G06320/AT1G76650/AT5G35735/AT2G36220/AT1G07400/AT1G07135/AT1G27730/AT5G45630/AT2G14247/AT4G29780/AT5G20790/AT3G56880/AT2G46400/AT5G12020/AT5G45340/AT1G22220/AT5G66650/AT4G10265/AT2G22500/AT5G54490…	41
8	Col_up	GO:0000959	mitochondrial RNA metabolic process	14/912	61/21845	1.59728e-07	3.28641e-05	3.05165e-05	AT5G39840/AT1G06140/AT3G23830/AT4G32430/AT5G08490/AT5G14580/AT5G61030/AT5G64710/AT5G46920/AT3G12770/AT5G19020/AT4G30700/AT1G64310/AT3G13880	14
9	Col_up	GO:0009813	flavonoid biosynthetic process	14/912	74/21845	1.95342e-06	0.000357258	0.000331738	AT4G09820/AT2G47460/AT5G49330/AT4G14090/AT5G63590/AT1G32640/AT2G22960/AT5G07990/AT5G17220/AT2G45400/AT3G62610/AT1G06000/AT3G21560/AT5G41315	14
10	Col_up	GO:0051553	flavone biosynthetic process	7/912	17/21845	2.90923e-06	0.000435327	0.00040423	AT2G47460/AT5G49330/AT5G63590/AT2G22960/AT5G17220/AT3G62610/AT1G06000	7
11	Col_up	GO:0051555	flavonol biosynthetic process	7/912	17/21845	2.90923e-06	0.000435327	0.00040423	AT2G47460/AT5G49330/AT5G63590/AT2G22960/AT5G17220/AT3G62610/AT1G06000	7
12	Col_up	GO:0042493	response to drug	42/912	470/21845	3.27404e-06	0.000449089	0.000417009	AT3G20470/AT3G10985/AT4G10250/AT3G16720/AT5G51190/AT4G25100/AT1G20823/AT5G37770/AT1G53540/AT2G16990/AT4G28110/AT5G62020/AT1G12480/AT3G61190/AT1G72520/AT4G19030/AT4G24570/AT1G59860/AT2G26150/AT5G12030/AT5G06320/AT4G23810/AT3G17790/AT1G32640/AT3G46620/AT1G07400/AT3G10930/AT1G27730/AT3G29035/AT4G17490/AT5G47230/AT2G46400/AT2G44840/AT5G12020/AT1G21910/AT4G10380/AT3G50930/AT2G22500/AT5G09470/AT5G03720…	42
13	Col_up	GO:0009963	positive regulation of flavonoid biosynthetic process	6/912	12/21845	3.87704e-06	0.000490893	0.000455827	AT4G09820/AT2G47460/AT5G49330/AT1G32640/AT3G62610/AT5G41315	6
14	Col_up	GO:0051552	flavone metabolic process	7/912	18/21845	4.58893e-06	0.000503558	0.000467587	AT2G47460/AT5G49330/AT5G63590/AT2G22960/AT5G17220/AT3G62610/AT1G06000	7
15	Col_up	GO:0051554	flavonol metabolic process	7/912	18/21845	4.58893e-06	0.000503558	0.000467587	AT2G47460/AT5G49330/AT5G63590/AT2G22960/AT5G17220/AT3G62610/AT1G06000	7
16	Col_up	GO:0009408	response to heat	26/912	234/21845	5.76923e-06	0.000559587	0.000519614	AT3G12580/AT4G10250/AT5G48570/AT4G12400/AT5G37770/AT1G53540/AT5G52640/AT5G62020/AT5G02490/AT3G23990/AT3G61190/AT1G59860/AT2G26150/AT4G29520/AT5G12030/AT4G26780/AT1G07400/AT1G51670/AT4G29770/AT1G14980/AT5G60970/AT5G12020/AT1G21910/AT5G47550/AT1G56300/AT5G03720	26
17	Col_up	GO:1900864	mitochondrial RNA modification	9/912	33/21845	5.77946e-06	0.000559587	0.000519614	AT1G06140/AT3G23830/AT5G08490/AT5G61030/AT3G12770/AT5G19020/AT4G30700/AT1G64310/AT3G13880	9
18	Col_up	GO:0009611	response to wounding	24/912	216/21845	1.3042e-05	0.00119262	0.00110743	AT1G17380/AT2G28900/AT2G30020/AT3G61190/AT1G72520/AT1G17420/AT1G74930/AT1G72920/AT4G39980/AT5G06320/AT1G76650/AT1G17840/AT1G32640/AT2G26690/AT5G42650/AT1G27730/AT2G27690/AT3G29035/AT1G20510/AT3G44260/AT5G47240/AT1G19180/AT4G28680/AT4G11280	24
19	Col_up	GO:0006457	protein folding	21/912	176/21845	1.5174e-05	0.00131455	0.00122065	AT3G12580/AT4G10250/AT3G56070/AT5G48570/AT1G23100/AT1G53540/AT5G52640/AT5G02490/AT3G23990/AT1G59860/AT4G29520/AT5G12030/AT2G33210/AT3G07770/AT4G26780/AT1G07400/AT1G14980/AT4G37910/AT5G12020/AT3G13860/AT2G20560	21
20	Col_up	GO:0042542	response to hydrogen peroxide	12/912	66/21845	1.60393e-05	0.00132003	0.00122574	AT4G10250/AT5G37770/AT1G53540/AT1G59860/AT2G26150/AT5G12030/AT4G23810/AT3G17790/AT1G07400/AT3G10930/AT3G29035/AT5G12020	12
21	Col_up	GO:0009812	flavonoid metabolic process	14/912	90/21845	2.08457e-05	0.00163391	0.00151719	AT4G09820/AT2G47460/AT5G49330/AT4G14090/AT5G63590/AT1G32640/AT2G22960/AT5G07990/AT5G17220/AT2G45400/AT3G62610/AT1G06000/AT3G21560/AT5G41315	14
22	Col_up	GO:0006820	anion transport	29/912	306/21845	3.67173e-05	0.00274712	0.00255089	AT5G14570/AT1G61800/AT3G54830/AT1G27080/AT2G33260/AT1G20823/AT5G17630/AT2G16990/AT1G35350/AT1G12480/AT1G14040/AT1G44100/AT4G19030/AT5G16740/AT4G24570/AT2G06925/AT5G40780/AT1G17840/AT5G66816/AT5G03545/AT1G47670/AT2G03260/AT4G10380/AT2G27240/AT2G22500/AT5G63850/AT5G50800/AT5G09470/AT3G45650	29
23	Col_up	GO:0000302	response to reactive oxygen species	18/912	154/21845	7.92076e-05	0.0052664	0.0048902	AT3G10985/AT4G10250/AT4G25100/AT5G37770/AT1G53540/AT1G12480/AT1G72520/AT1G59860/AT2G26150/AT5G12030/AT4G23810/AT3G17790/AT1G07400/AT3G10930/AT3G29035/AT4G17490/AT3G56240/AT5G12020	18
24	Col_up	GO:1903825	organic acid transmembrane transport	13/912	89/21845	7.99879e-05	0.0052664	0.0048902	AT1G61800/AT3G54830/AT2G33260/AT5G17630/AT1G44100/AT5G16740/AT4G24570/AT5G40780/AT1G47670/AT2G22500/AT5G63850/AT5G50800/AT5G09470	13
25	Col_up	GO:1905039	carboxylic acid transmembrane transport	13/912	89/21845	7.99879e-05	0.0052664	0.0048902	AT1G61800/AT3G54830/AT2G33260/AT5G17630/AT1G44100/AT5G16740/AT4G24570/AT5G40780/AT1G47670/AT2G22500/AT5G63850/AT5G50800/AT5G09470	13
26	Col_up	GO:0009962	regulation of flavonoid biosynthetic process	7/912	27/21845	9.21108e-05	0.00582457	0.0054085	AT4G09820/AT2G47460/AT5G49330/AT1G32640/AT5G17220/AT3G62610/AT5G41315	7
27	Col_up	GO:0006817	phosphate ion transport	8/912	36/21845	9.55427e-05	0.00582457	0.0054085	AT1G20823/AT1G35350/AT1G14040/AT4G24570/AT5G03545/AT2G03260/AT2G22500/AT5G09470	8
28	Col_up	GO:0015849	organic acid transport	16/912	133/21845	0.000138297	0.00784954	0.00728882	AT1G61800/AT3G54830/AT2G33260/AT5G17630/AT1G44100/AT5G16740/AT4G24570/AT2G06925/AT5G40780/AT1G17840/AT1G47670/AT2G27240/AT2G22500/AT5G63850/AT5G50800/AT5G09470	16
29	Col_up	GO:0046942	carboxylic acid transport	16/912	133/21845	0.000138297	0.00784954	0.00728882	AT1G61800/AT3G54830/AT2G33260/AT5G17630/AT1G44100/AT5G16740/AT4G24570/AT2G06925/AT5G40780/AT1G17840/AT1G47670/AT2G27240/AT2G22500/AT5G63850/AT5G50800/AT5G09470	16
30	Col_up	GO:0010200	response to chitin	16/912	141/21845	0.000273045	0.0149811	0.0139109	AT3G16720/AT5G51190/AT1G20823/AT4G28110/AT5G62020/AT2G26150/AT4G23810/AT1G32640/AT3G46620/AT1G27730/AT4G17490/AT5G47230/AT2G46400/AT2G44840/AT5G03720/AT2G17040	16
31	Col_up	GO:0015698	inorganic anion transport	14/912	116/21845	0.00034296	0.01821	0.0169092	AT5G14570/AT1G27080/AT1G20823/AT1G35350/AT1G14040/AT4G19030/AT4G24570/AT5G66816/AT5G03545/AT2G03260/AT4G10380/AT2G22500/AT5G09470/AT3G45650	14
32	Col_up	GO:0046677	response to antibiotic	23/912	251/21845	0.000368076	0.0185971	0.0172687	AT3G20470/AT3G10985/AT4G10250/AT4G25100/AT5G37770/AT1G53540/AT1G12480/AT3G61190/AT1G72520/AT1G59860/AT2G26150/AT5G12030/AT5G06320/AT4G23810/AT3G17790/AT1G07400/AT3G10930/AT3G29035/AT2G46400/AT5G12020/AT1G21910/AT3G50930/AT3G50410	23
33	Col_up	GO:0006949	syncytium formation	5/912	16/21845	0.000372847	0.0185971	0.0172687	AT2G28950/AT2G20750/AT1G14520/AT2G37640/AT2G03090	5
34	Col_up	GO:0045143	homologous chromosome segregation	7/912	34/21845	0.000432449	0.0209356	0.0194401	AT1G10710/AT2G46980/AT1G67370/AT5G05490/AT1G14750/AT4G32200/AT3G22880	7
35	Col_up	GO:0051259	protein complex oligomerization	8/912	45/21845	0.000488269	0.0229626	0.0213223	AT4G10250/AT1G73010/AT1G53540/AT1G59860/AT5G12030/AT1G32640/AT1G07400/AT5G12020	8
36	Col_up	GO:0009636	response to toxic substance	19/912	198/21845	0.000660581	0.0302032	0.0280457	AT4G10250/AT5G24660/AT4G25100/AT5G37770/AT1G53540/AT1G59860/AT2G26150/AT5G12030/AT4G23810/AT3G17790/AT3G49570/AT1G07400/AT3G10930/AT3G29035/AT5G17220/AT1G32780/AT5G12020/AT1G69930/AT3G49580	19
37	Col_up	GO:0009753	response to jasmonic acid	19/912	199/21845	0.000702449	0.0312495	0.0290172	AT1G17380/AT4G09820/AT2G28900/AT3G11180/AT3G27920/AT4G19810/AT1G17420/AT5G37500/AT4G23810/AT1G32640/AT2G26690/AT5G42650/AT5G24780/AT2G46400/AT1G21910/AT1G72260/AT1G19180/AT4G11280/AT5G41315	19
38	Col_up	GO:0009828	plant-type cell wall loosening	7/912	37/21845	0.000742248	0.0321511	0.0298544	AT2G28950/AT2G20750/AT2G37640/AT3G45970/AT3G29030/AT4G38400/AT2G03090	7
39	Col_up	GO:0080156	mitochondrial mRNA modification	6/912	28/21845	0.000891117	0.0376097	0.0349231	AT1G06140/AT5G08490/AT5G61030/AT3G12770/AT5G19020/AT4G30700	6
40	Col_up	GO:0009827	plant-type cell wall modification	9/912	62/21845	0.00102932	0.0413234	0.0383715	AT2G28950/AT5G62360/AT2G20750/AT4G34980/AT2G37640/AT3G45970/AT3G29030/AT4G38400/AT2G03090	9
41	Col_up	GO:0140053	mitochondrial gene expression	9/912	62/21845	0.00102932	0.0413234	0.0383715	AT5G39840/AT1G15870/AT5G14580/AT5G02050/AT5G64710/AT5G64320/AT5G46920/AT4G02930/AT4G30700	9
42	Col_up	GO:0007129	synapsis	6/912	29/21845	0.00108432	0.042495	0.0394595	AT1G10710/AT2G46980/AT1G67370/AT1G14750/AT4G32200/AT3G22880	6
43	Col_up	GO:0009695	jasmonic acid biosynthetic process	6/912	30/21845	0.00130808	0.0493124	0.0457899	AT1G72520/AT1G17420/AT5G42650/AT3G25780/AT1G20510/AT3G25760	6
44	Col_up	GO:0070192	chromosome organization involved in meiotic cell cycle	8/912	52/21845	0.00131819	0.0493124	0.0457899	AT1G10710/AT2G46980/AT1G67370/AT5G05490/AT1G14750/AT4G32200/AT3G22880/AT5G51330	8
45	Col_up	GO:0009664	plant-type cell wall organization	15/912	148/21845	0.00136175	0.0498097	0.0462516	AT2G28950/AT5G62360/AT2G20750/AT4G34980/AT5G41040/AT1G64760/AT2G37640/AT3G45970/AT3G29810/AT1G21310/AT3G29030/AT2G45890/AT4G38400/AT2G03090/AT2G43150	15
46	mus81_up	GO:0051553	flavone biosynthetic process	11/738	17/21845	6.25411e-13	4.63429e-10	4.26596e-10	AT2G47460/AT5G49330/AT1G78570/AT5G63590/AT2G22960/AT5G17220/AT4G34135/AT3G62610/AT2G16720/AT5G54160/AT1G06000	11
47	mus81_up	GO:0051555	flavonol biosynthetic process	11/738	17/21845	6.25411e-13	4.63429e-10	4.26596e-10	AT2G47460/AT5G49330/AT1G78570/AT5G63590/AT2G22960/AT5G17220/AT4G34135/AT3G62610/AT2G16720/AT5G54160/AT1G06000	11
48	mus81_up	GO:0051552	flavone metabolic process	11/738	18/21845	1.55917e-12	5.77671e-10	5.31758e-10	AT2G47460/AT5G49330/AT1G78570/AT5G63590/AT2G22960/AT5G17220/AT4G34135/AT3G62610/AT2G16720/AT5G54160/AT1G06000	11
49	mus81_up	GO:0051554	flavonol metabolic process	11/738	18/21845	1.55917e-12	5.77671e-10	5.31758e-10	AT2G47460/AT5G49330/AT1G78570/AT5G63590/AT2G22960/AT5G17220/AT4G34135/AT3G62610/AT2G16720/AT5G54160/AT1G06000	11
50	mus81_up	GO:0009813	flavonoid biosynthetic process	19/738	74/21845	3.30734e-12	9.80295e-10	9.02381e-10	AT5G11260/AT4G09820/AT2G47460/AT5G49330/AT1G78570/AT4G14090/AT5G63590/AT2G26170/AT2G22960/AT5G07990/AT5G17220/AT2G45400/AT4G34135/AT3G62610/AT2G16720/AT5G54160/AT1G06000/AT3G21560/AT5G41315	19
51	mus81_up	GO:0006457	protein folding	27/738	176/21845	4.85166e-11	1.19836e-08	1.10312e-08	AT3G12580/AT4G10250/AT5G61790/AT5G48570/AT3G09440/AT5G52640/AT5G02490/AT3G23990/AT1G59860/AT5G42020/AT4G29520/AT3G25230/AT5G56030/AT5G12030/AT4G24190/AT3G62600/AT3G13470/AT3G07770/AT4G26780/AT1G07400/AT1G14980/AT5G56010/AT2G04030/AT5G09590/AT5G12020/AT2G20560/AT1G77510	27
52	mus81_up	GO:0009408	response to heat	31/738	234/21845	8.59783e-11	1.82028e-08	1.67561e-08	AT3G12580/AT4G10250/AT5G48570/AT4G36990/AT3G09440/AT4G12400/AT5G52640/AT5G02490/AT3G23990/AT1G59860/AT5G42020/AT2G26150/AT4G29520/AT3G25230/AT5G56030/AT5G12030/AT1G66080/AT4G26780/AT1G07400/AT4G29770/AT1G14980/AT5G56010/AT1G74310/AT5G60970/AT3G08970/AT2G04030/AT5G09590/AT3G24500/AT5G12020/AT1G21910/AT5G47550	31
53	mus81_up	GO:0009812	flavonoid metabolic process	19/738	90/21845	1.33531e-10	2.47367e-08	2.27706e-08	AT5G11260/AT4G09820/AT2G47460/AT5G49330/AT1G78570/AT4G14090/AT5G63590/AT2G26170/AT2G22960/AT5G07990/AT5G17220/AT2G45400/AT4G34135/AT3G62610/AT2G16720/AT5G54160/AT1G06000/AT3G21560/AT5G41315	19
54	mus81_up	GO:0009963	positive regulation of flavonoid biosynthetic process	7/738	12/21845	3.33568e-08	5.49276e-06	5.05619e-06	AT5G11260/AT4G09820/AT2G47460/AT5G49330/AT2G26170/AT3G62610/AT5G41315	7
55	mus81_up	GO:0009962	regulation of flavonoid biosynthetic process	9/738	27/21845	1.48169e-07	2.19586e-05	2.02133e-05	AT5G11260/AT4G09820/AT2G47460/AT5G49330/AT2G26170/AT5G17220/AT3G62610/AT2G16720/AT5G41315	9
56	mus81_up	GO:0061077	chaperone-mediated protein folding	13/738	66/21845	2.63499e-07	3.55006e-05	3.2679e-05	AT3G12580/AT5G48570/AT3G09440/AT5G52640/AT5G02490/AT5G42020/AT4G29520/AT3G25230/AT5G56030/AT3G13470/AT1G14980/AT5G09590/AT2G20560	13
57	mus81_up	GO:0044550	secondary metabolite biosynthetic process	19/738	169/21845	4.70335e-06	0.000580863	0.000534696	AT4G09820/AT5G48850/AT1G04770/AT3G27785/AT5G41040/AT5G23190/AT5G66390/AT1G18590/AT2G21890/AT4G37980/AT2G25450/AT3G17390/AT3G44550/AT1G62540/AT3G13610/AT1G16490/AT4G03070/AT5G54160/AT1G03980	19
58	mus81_up	GO:0046148	pigment biosynthetic process	17/738	146/21845	9.22618e-06	0.00105178	0.000968189	AT4G09820/AT2G47460/AT5G49330/AT1G78570/AT4G14090/AT5G63590/AT2G26170/AT2G16570/AT2G22960/AT5G17220/AT4G34135/AT3G62610/AT2G16720/AT5G54160/AT1G06000/AT3G21560/AT5G41315	17
59	mus81_up	GO:0042440	pigment metabolic process	18/738	177/21845	3.28471e-05	0.00341676	0.0031452	AT5G11260/AT4G09820/AT2G47460/AT5G49330/AT1G78570/AT4G14090/AT5G63590/AT2G26170/AT2G16570/AT2G22960/AT5G17220/AT4G34135/AT3G62610/AT2G16720/AT5G54160/AT1G06000/AT3G21560/AT5G41315	18
60	mus81_up	GO:0034605	cellular response to heat	10/738	61/21845	3.45826e-05	0.00341676	0.0031452	AT5G48570/AT4G36990/AT5G52640/AT2G26150/AT3G25230/AT5G56030/AT5G56010/AT3G08970/AT1G21910/AT5G47550	10
61	mus81_up	GO:0008216	spermidine metabolic process	5/738	13/21845	4.45782e-05	0.00412905	0.00380087	AT1G65840/AT3G25570/AT2G23510/AT1G74540/AT1G74550	5
62	mus81_up	GO:0006986	response to unfolded protein	9/738	53/21845	6.38443e-05	0.00525651	0.00483873	AT3G12580/AT5G61790/AT3G09440/AT5G02490/AT5G42020/AT2G26150/AT3G28620/AT3G56660/AT5G09590	9
63	mus81_up	GO:0034620	cellular response to unfolded protein	9/738	53/21845	6.38443e-05	0.00525651	0.00483873	AT3G12580/AT5G61790/AT3G09440/AT5G02490/AT5G42020/AT2G26150/AT3G28620/AT3G56660/AT5G09590	9
64	mus81_up	GO:0048658	anther wall tapetum development	6/738	22/21845	6.83668e-05	0.00533261	0.00490877	AT1G44970/AT3G61730/AT3G28470/AT1G06170/AT4G16270/AT4G21330	6
65	mus81_up	GO:0001666	response to hypoxia	22/738	264/21845	9.89402e-05	0.00727197	0.00669399	AT4G10250/AT5G20150/AT2G34390/AT1G35140/AT1G72430/AT1G73010/AT5G57090/AT2G41090/AT1G59860/AT2G26150/AT5G12030/AT5G47060/AT5G35735/AT1G66080/AT1G07400/AT1G74310/AT3G24500/AT5G12020/AT1G67360/AT3G50440/AT2G22500/AT3G60520	22
66	mus81_up	GO:0019748	secondary metabolic process	27/738	360/21845	0.000103044	0.00727197	0.00669399	AT1G51680/AT4G09820/AT2G44460/AT5G48850/AT1G04770/AT3G27785/AT5G41040/AT5G23190/AT5G66390/AT1G18590/AT2G21890/AT4G37980/AT2G25450/AT5G48180/AT3G17390/AT5G17220/AT3G44550/AT1G62540/AT3G13610/AT1G16490/AT1G69930/AT1G73300/AT4G03070/AT5G54160/AT1G03980/AT2G29490/AT3G21560	27
67	mus81_up	GO:0036293	response to decreased oxygen levels	22/738	268/21845	0.000123104	0.00799775	0.00736208	AT4G10250/AT5G20150/AT2G34390/AT1G35140/AT1G72430/AT1G73010/AT5G57090/AT2G41090/AT1G59860/AT2G26150/AT5G12030/AT5G47060/AT5G35735/AT1G66080/AT1G07400/AT1G74310/AT3G24500/AT5G12020/AT1G67360/AT3G50440/AT2G22500/AT3G60520	22
68	mus81_up	GO:1901617	organic hydroxy compound biosynthetic process	18/738	196/21845	0.000124122	0.00799775	0.00736208	AT4G09820/AT2G47460/AT5G49330/AT3G19270/AT1G78570/AT3G16050/AT5G10170/AT5G63590/AT3G01420/AT2G34490/AT2G22960/AT5G17220/AT2G45400/AT4G34135/AT3G62610/AT2G16720/AT5G54160/AT1G06000	18
69	mus81_up	GO:0070482	response to oxygen levels	22/738	269/21845	0.000129909	0.00802186	0.00738428	AT4G10250/AT5G20150/AT2G34390/AT1G35140/AT1G72430/AT1G73010/AT5G57090/AT2G41090/AT1G59860/AT2G26150/AT5G12030/AT5G47060/AT5G35735/AT1G66080/AT1G07400/AT1G74310/AT3G24500/AT5G12020/AT1G67360/AT3G50440/AT2G22500/AT3G60520	22
70	mus81_up	GO:0006636	unsaturated fatty acid biosynthetic process	6/738	25/21845	0.000148821	0.00854581	0.00786658	AT4G27030/AT3G27785/AT1G06120/AT3G01420/AT3G15870/AT5G16230	6
71	mus81_up	GO:1901615	organic hydroxy compound metabolic process	25/738	329/21845	0.000149926	0.00854581	0.00786658	AT4G09820/AT2G47460/AT2G23570/AT5G49330/AT3G10370/AT3G19270/AT1G78570/AT3G16050/AT1G14520/AT5G10170/AT5G63590/AT4G18010/AT3G01420/AT2G34490/AT2G22960/AT3G48720/AT5G17220/AT2G45400/AT4G34135/AT3G50440/AT3G62610/AT2G16720/AT5G54160/AT5G64000/AT1G06000	25
72	mus81_up	GO:0071456	cellular response to hypoxia	20/738	238/21845	0.000180433	0.00915125	0.0084239	AT4G10250/AT5G20150/AT1G35140/AT1G72430/AT1G73010/AT2G41090/AT1G59860/AT2G26150/AT5G12030/AT5G47060/AT5G35735/AT1G66080/AT1G07400/AT1G74310/AT3G24500/AT5G12020/AT1G67360/AT3G50440/AT2G22500/AT3G60520	20
73	mus81_up	GO:0033559	unsaturated fatty acid metabolic process	6/738	26/21845	0.000187974	0.00915125	0.0084239	AT4G27030/AT3G27785/AT1G06120/AT3G01420/AT3G15870/AT5G16230	6
74	mus81_up	GO:0006979	response to oxidative stress	31/738	456/21845	0.00019641	0.00915125	0.0084239	AT3G10985/AT4G10250/AT1G44970/AT5G38000/ATMG01190/AT5G06730/AT1G80130/AT5G19880/AT5G66390/AT2G41090/AT1G12480/AT5G19875/AT1G59860/AT2G18150/AT2G26150/AT5G12030/AT3G17790/AT3G28200/AT1G05260/AT3G01420/AT1G07400/AT4G16270/AT3G56240/AT4G04830/AT2G24800/AT4G36430/AT5G12020/AT3G13610/AT5G17000/AT3G02840/AT1G76080	31
75	mus81_up	GO:0036294	cellular response to decreased oxygen levels	20/738	240/21845	0.000201736	0.00915125	0.0084239	AT4G10250/AT5G20150/AT1G35140/AT1G72430/AT1G73010/AT2G41090/AT1G59860/AT2G26150/AT5G12030/AT5G47060/AT5G35735/AT1G66080/AT1G07400/AT1G74310/AT3G24500/AT5G12020/AT1G67360/AT3G50440/AT2G22500/AT3G60520	20
76	mus81_up	GO:0071453	cellular response to oxygen levels	20/738	240/21845	0.000201736	0.00915125	0.0084239	AT4G10250/AT5G20150/AT1G35140/AT1G72430/AT1G73010/AT2G41090/AT1G59860/AT2G26150/AT5G12030/AT5G47060/AT5G35735/AT1G66080/AT1G07400/AT1G74310/AT3G24500/AT5G12020/AT1G67360/AT3G50440/AT2G22500/AT3G60520	20
77	mus81_up	GO:0009828	plant-type cell wall loosening	7/738	37/21845	0.000207459	0.00915125	0.0084239	AT4G30270/AT2G28950/AT3G45970/AT3G29030/AT4G38400/AT2G03090/AT4G39010	7
78	mus81_up	GO:0048653	anther development	10/738	75/21845	0.000207939	0.00915125	0.0084239	AT1G44970/AT1G13400/AT3G61730/AT5G14070/AT3G28470/AT2G17950/AT1G06170/AT4G16270/AT4G21330/AT5G50800	10
79	mus81_up	GO:0051084	'de novo' posttranslational protein folding	8/738	49/21845	0.000216123	0.00915125	0.0084239	AT3G12580/AT3G09440/AT5G02490/AT5G42020/AT3G13470/AT1G14980/AT5G09590/AT2G20560	8
80	mus81_up	GO:0051085	chaperone cofactor-dependent protein refolding	8/738	49/21845	0.000216123	0.00915125	0.0084239	AT3G12580/AT3G09440/AT5G02490/AT5G42020/AT3G13470/AT1G14980/AT5G09590/AT2G20560	8
81	mus81_up	GO:0009827	plant-type cell wall modification	9/738	62/21845	0.000223012	0.00918064	0.00845097	AT4G30270/AT2G28950/AT4G34980/AT1G10550/AT3G45970/AT3G29030/AT4G38400/AT2G03090/AT4G39010	9
82	mus81_up	GO:0009698	phenylpropanoid metabolic process	13/738	122/21845	0.000250309	0.0100259	0.00922903	AT1G51680/AT4G09820/AT5G41040/AT5G23190/AT5G66390/AT2G21890/AT4G37980/AT3G17390/AT3G44550/AT3G13610/AT1G16490/AT5G54160/AT3G21560	13
83	mus81_up	GO:0006458	'de novo' protein folding	8/738	51/21845	0.000287571	0.0112153	0.0103239	AT3G12580/AT3G09440/AT5G02490/AT5G42020/AT3G13470/AT1G14980/AT5G09590/AT2G20560	8
84	mus81_up	GO:0044262	cellular carbohydrate metabolic process	28/738	405/21845	0.000300343	0.011413	0.0105059	AT4G30270/AT4G37800/AT1G44830/AT5G48850/AT1G04770/AT4G03210/AT3G27785/AT5G41040/AT1G02640/AT3G10370/AT3G23730/AT1G71890/AT1G14520/AT5G10170/AT1G10550/AT4G15210/AT5G62220/AT2G01850/AT2G32530/AT5G03650/AT5G54690/AT4G18010/AT2G40840/AT2G25450/AT3G29810/AT4G39210/AT1G78090/AT5G64000	28
85	mus81_up	GO:0006820	anion transport	23/738	306/21845	0.000317416	0.0117603	0.0108256	AT5G14570/AT1G61800/AT2G34390/AT3G54830/AT5G24920/AT1G12110/AT1G27080/AT5G02170/AT2G16990/AT1G35350/AT1G12480/AT5G16740/AT1G26730/AT1G10010/AT1G17840/AT5G03545/AT1G71960/AT4G10380/AT2G27240/AT2G22500/AT5G50800/AT5G09470/AT1G68710	23
86	mus81_up	GO:0042493	response to drug	31/738	470/21845	0.000331842	0.0119949	0.0110415	AT3G10985/AT4G10250/AT1G44830/AT3G21150/AT1G08930/AT2G16990/AT4G28110/AT1G12480/AT1G59860/AT2G26150/AT5G12030/AT3G17790/AT2G17950/AT3G01420/AT5G51060/AT1G07400/AT2G35160/AT3G14395/AT5G65600/AT4G03470/AT3G23250/AT5G13170/AT5G12020/AT3G13610/AT2G24570/AT1G21910/AT4G10380/AT3G02840/AT2G22500/AT1G66160/AT5G09470	31
87	mus81_up	GO:0009699	phenylpropanoid biosynthetic process	11/738	95/21845	0.000359688	0.0126918	0.0116831	AT4G09820/AT5G41040/AT5G23190/AT5G66390/AT2G21890/AT4G37980/AT3G17390/AT3G44550/AT3G13610/AT1G16490/AT5G54160	11
88	mus81_up	GO:0035966	response to topologically incorrect protein	10/738	81/21845	0.000393048	0.0135464	0.0124698	AT3G12580/AT5G61790/AT3G09440/AT5G02490/AT5G42020/AT2G26150/AT1G70910/AT3G28620/AT3G56660/AT5G09590	10
89	mus81_up	GO:0009636	response to toxic substance	17/738	198/21845	0.000419033	0.0141138	0.012992	AT4G10250/AT5G24660/AT1G59860/AT2G26150/AT5G12030/AT3G17790/AT2G17950/AT3G49570/AT1G07400/AT5G17220/AT1G32780/AT5G12020/AT3G13610/AT1G69930/AT1G03980/AT2G29490/AT3G49580	17
90	mus81_up	GO:0006631	fatty acid metabolic process	19/738	237/21845	0.000467751	0.0154046	0.0141803	AT4G27030/AT3G27785/AT1G19640/AT3G06460/AT5G23190/AT1G72970/AT5G49070/AT2G11810/AT1G06120/AT3G10280/AT4G37980/AT2G45970/AT3G22400/AT3G01420/AT1G65520/AT1G25450/AT3G15870/AT5G16230/AT2G46720	19
91	mus81_up	GO:0006633	fatty acid biosynthetic process	14/738	148/21845	0.000505145	0.0162348	0.0149445	AT4G27030/AT3G27785/AT1G19640/AT3G06460/AT5G23190/AT5G49070/AT1G06120/AT3G10280/AT3G22400/AT3G01420/AT1G25450/AT3G15870/AT5G16230/AT2G46720	14
92	mus81_up	GO:0010439	regulation of glucosinolate biosynthetic process	4/738	12/21845	0.000514869	0.0162348	0.0149445	AT5G48850/AT1G04770/AT3G27785/AT2G25450	4
93	mus81_up	GO:1901659	glycosyl compound biosynthetic process	9/738	70/21845	0.000562591	0.0172006	0.0158335	AT5G48850/AT1G04770/AT3G27785/AT1G18590/AT3G25570/AT1G79470/AT2G25450/AT1G62540/AT4G03070	9
94	mus81_up	GO:0015849	organic acid transport	13/738	133/21845	0.000580318	0.0172006	0.0158335	AT1G61800/AT2G34390/AT3G54830/AT5G24920/AT5G02170/AT5G16740/AT1G10010/AT1G17840/AT1G71960/AT2G27240/AT2G22500/AT5G50800/AT5G09470	13
95	mus81_up	GO:0046942	carboxylic acid transport	13/738	133/21845	0.000580318	0.0172006	0.0158335	AT1G61800/AT2G34390/AT3G54830/AT5G24920/AT5G02170/AT5G16740/AT1G10010/AT1G17840/AT1G71960/AT2G27240/AT2G22500/AT5G50800/AT5G09470	13
96	mus81_up	GO:0051259	protein complex oligomerization	7/738	45/21845	0.000723701	0.0210299	0.0193584	AT1G64660/AT4G10250/AT1G73010/AT1G59860/AT5G12030/AT1G07400/AT5G12020	7
97	mus81_up	GO:0045143	homologous chromosome segregation	6/738	34/21845	0.000872648	0.0248705	0.0228937	AT4G14180/AT1G67370/AT5G05490/AT1G14750/AT4G32200/AT3G22880	6
98	mus81_up	GO:0046677	response to antibiotic	19/738	251/21845	0.000937544	0.0262159	0.0241322	AT3G10985/AT4G10250/AT1G44830/AT1G12480/AT1G59860/AT2G26150/AT5G12030/AT3G17790/AT2G17950/AT3G01420/AT1G07400/AT3G14395/AT5G65600/AT4G03470/AT5G13170/AT5G12020/AT3G13610/AT1G21910/AT3G02840	19
99	mus81_up	GO:0035967	cellular response to topologically incorrect protein	9/738	76/21845	0.00103023	0.028274	0.0260268	AT3G12580/AT5G61790/AT3G09440/AT5G02490/AT5G42020/AT2G26150/AT3G28620/AT3G56660/AT5G09590	9
100	mus81_up	GO:0006595	polyamine metabolic process	5/738	24/21845	0.00108122	0.0291339	0.0268183	AT1G65840/AT3G25570/AT2G23510/AT1G74540/AT1G74550	5
101	mus81_up	GO:0051026	chiasma assembly	4/738	15/21845	0.00130944	0.0341722	0.0314562	AT4G14180/AT1G67370/AT1G14750/AT3G22880	4
102	mus81_up	GO:0042026	protein refolding	5/738	25/21845	0.00131431	0.0341722	0.0314562	AT3G12580/AT3G09440/AT5G02490/AT5G42020/AT5G09590	5
103	mus81_up	GO:0015711	organic anion transport	15/738	182/21845	0.00135388	0.0345939	0.0318444	AT1G61800/AT2G34390/AT3G54830/AT5G24920/AT5G02170/AT2G16990/AT5G16740/AT1G10010/AT1G17840/AT1G71960/AT2G27240/AT2G22500/AT5G50800/AT5G09470/AT1G68710	15
104	mus81_up	GO:0000038	very long-chain fatty acid metabolic process	6/738	37/21845	0.00138437	0.0347735	0.0320097	AT3G06460/AT5G23190/AT5G49070/AT3G10280/AT1G25450/AT2G46720	6
105	mus81_up	GO:0009664	plant-type cell wall organization	13/738	148/21845	0.00156635	0.0386888	0.0356138	AT4G30270/AT2G28950/AT4G34980/AT5G41040/AT1G10550/AT3G45970/AT3G29810/AT3G29030/AT2G45890/AT4G38400/AT2G03090/AT2G43150/AT4G39010	13
106	mus81_up	GO:0042542	response to hydrogen peroxide	8/738	66/21845	0.00166483	0.0390744	0.0359688	AT4G10250/AT1G59860/AT2G26150/AT5G12030/AT3G17790/AT1G07400/AT5G12020/AT3G13610	8
107	mus81_up	GO:0010286	heat acclimation	7/738	52/21845	0.00174016	0.0390744	0.0359688	AT5G48570/AT4G12400/AT2G26150/AT3G25230/AT5G56030/AT1G66080/AT4G26780	7
108	mus81_up	GO:0016144	S-glycoside biosynthetic process	7/738	52/21845	0.00174016	0.0390744	0.0359688	AT5G48850/AT1G04770/AT3G27785/AT1G18590/AT2G25450/AT1G62540/AT4G03070	7
109	mus81_up	GO:0019758	glycosinolate biosynthetic process	7/738	52/21845	0.00174016	0.0390744	0.0359688	AT5G48850/AT1G04770/AT3G27785/AT1G18590/AT2G25450/AT1G62540/AT4G03070	7
110	mus81_up	GO:0019761	glucosinolate biosynthetic process	7/738	52/21845	0.00174016	0.0390744	0.0359688	AT5G48850/AT1G04770/AT3G27785/AT1G18590/AT2G25450/AT1G62540/AT4G03070	7
111	mus81_up	GO:0070192	chromosome organization involved in meiotic cell cycle	7/738	52/21845	0.00174016	0.0390744	0.0359688	AT4G14180/AT1G67370/AT5G05490/AT1G14750/AT4G32200/AT3G22880/AT5G51330	7
112	mus81_up	GO:1900376	regulation of secondary metabolite biosynthetic process	5/738	27/21845	0.00188878	0.0413661	0.0380783	AT4G09820/AT5G48850/AT1G04770/AT3G27785/AT2G25450	5
113	mus81_up	GO:0071669	plant-type cell wall organization or biogenesis	20/738	287/21845	0.00189804	0.0413661	0.0380783	AT4G30270/AT2G28950/AT1G03870/AT5G46960/AT4G34980/AT2G19440/AT5G41040/AT1G10550/AT3G45970/AT2G32530/AT3G29810/AT3G29030/AT2G45890/AT1G16490/AT3G08900/AT4G38400/AT2G03090/AT5G44130/AT2G43150/AT4G39010	20
114	mus81_up	GO:0042545	cell wall modification	14/738	171/21845	0.00205387	0.0441135	0.0406074	AT4G30270/AT2G28950/AT4G34980/AT3G14300/AT3G10720/AT1G10550/AT3G45970/AT1G06170/AT3G29030/AT4G38400/AT3G49220/AT5G50800/AT2G03090/AT4G39010	14
115	mus81_up	GO:0000302	response to reactive oxygen species	13/738	154/21845	0.00223396	0.0472962	0.0435371	AT3G10985/AT4G10250/AT1G12480/AT1G59860/AT2G26150/AT5G12030/AT3G17790/AT3G01420/AT1G07400/AT3G56240/AT5G12020/AT3G13610/AT3G02840	13
116	mus81_up	GO:0071555	cell wall organization	19/738	272/21845	0.00236936	0.0494562	0.0455254	AT4G30270/AT2G28950/AT4G34980/AT5G41040/AT3G14300/AT3G10720/AT1G10550/AT3G45970/AT1G06170/AT5G54690/AT3G29810/AT3G29030/AT2G45890/AT4G38400/AT3G49220/AT5G50800/AT2G03090/AT2G43150/AT4G39010	19
117	msh4_up	GO:0010582	floral meristem determinacy	8/632	20/21845	4.35069e-08	6.16928e-05	5.53224e-05	AT2G41370/AT1G26310/AT2G22540/AT5G61850/AT1G62360/AT5G14010/AT1G69120/AT1G69180	8
118	msh4_up	GO:0009813	flavonoid biosynthetic process	13/632	74/21845	1.82204e-07	0.000108367	9.71769e-05	AT3G55120/AT5G11260/AT4G09820/AT2G47460/AT1G56650/AT4G17880/AT5G49330/AT5G63590/AT2G22960/AT1G78600/AT3G62610/AT1G06000/AT3G21560	13
119	msh4_up	GO:0010022	meristem determinacy	8/632	24/21845	2.29267e-07	0.000108367	9.71769e-05	AT2G41370/AT1G26310/AT2G22540/AT5G61850/AT1G62360/AT5G14010/AT1G69120/AT1G69180	8
120	msh4_up	GO:0009963	positive regulation of flavonoid biosynthetic process	6/632	12/21845	4.56122e-07	0.000161695	0.000144999	AT5G11260/AT4G09820/AT2G47460/AT1G56650/AT5G49330/AT3G62610	6
121	msh4_up	GO:0009812	flavonoid metabolic process	13/632	90/21845	1.87324e-06	0.000531252	0.000476396	AT3G55120/AT5G11260/AT4G09820/AT2G47460/AT1G56650/AT4G17880/AT5G49330/AT5G63590/AT2G22960/AT1G78600/AT3G62610/AT1G06000/AT3G21560	13
122	msh4_up	GO:0051553	flavone biosynthetic process	6/632	17/21845	5.39744e-06	0.00109337	0.000980466	AT2G47460/AT5G49330/AT5G63590/AT2G22960/AT3G62610/AT1G06000	6
123	msh4_up	GO:0051555	flavonol biosynthetic process	6/632	17/21845	5.39744e-06	0.00109337	0.000980466	AT2G47460/AT5G49330/AT5G63590/AT2G22960/AT3G62610/AT1G06000	6
124	msh4_up	GO:0051552	flavone metabolic process	6/632	18/21845	7.89832e-06	0.00124442	0.00111593	AT2G47460/AT5G49330/AT5G63590/AT2G22960/AT3G62610/AT1G06000	6
125	msh4_up	GO:0051554	flavonol metabolic process	6/632	18/21845	7.89832e-06	0.00124442	0.00111593	AT2G47460/AT5G49330/AT5G63590/AT2G22960/AT3G62610/AT1G06000	6
126	msh4_up	GO:0046148	pigment biosynthetic process	15/632	146/21845	2.26774e-05	0.00321566	0.00288361	AT4G09820/AT2G47460/AT1G56650/AT4G17880/AT3G59400/AT5G49330/AT5G63590/AT5G44190/AT2G16570/AT2G22960/AT1G78600/AT3G62610/AT3G22840/AT1G06000/AT3G21560	15
127	msh4_up	GO:0009834	plant-type secondary cell wall biogenesis	11/632	85/21845	3.33667e-05	0.00412895	0.0037026	AT4G17880/AT5G48920/AT3G18660/AT1G43790/AT1G66230/AT1G12260/AT2G15440/AT1G27930/AT5G03170/AT4G36160/AT2G38080	11
128	msh4_up	GO:0090567	reproductive shoot system development	31/632	484/21845	3.49418e-05	0.00412895	0.0037026	AT2G41370/AT1G67260/AT1G11190/AT1G75520/AT5G17800/AT1G20823/AT4G31610/AT2G45650/AT1G26310/AT5G24860/AT2G22540/AT3G61730/AT2G03710/AT5G14070/AT4G36620/AT5G59990/AT5G61850/AT1G62360/AT4G18570/AT5G14010/AT5G44190/AT1G69120/AT2G31160/AT5G62230/AT4G21330/AT5G07180/AT3G63010/AT5G50800/AT2G27990/AT3G57920/AT1G69180	31
129	msh4_up	GO:0009908	flower development	30/632	471/21845	5.15434e-05	0.00562219	0.00504165	AT2G41370/AT1G67260/AT1G11190/AT1G75520/AT5G17800/AT1G20823/AT4G31610/AT2G45650/AT1G26310/AT5G24860/AT2G22540/AT3G61730/AT2G03710/AT5G14070/AT4G36620/AT5G59990/AT5G61850/AT1G62360/AT4G18570/AT5G14010/AT5G44190/AT1G69120/AT2G31160/AT5G62230/AT4G21330/AT5G07180/AT3G63010/AT5G50800/AT3G57920/AT1G69180	30
130	msh4_up	GO:0042440	pigment metabolic process	16/632	177/21845	5.9278e-05	0.00600401	0.00538404	AT5G11260/AT4G09820/AT2G47460/AT1G56650/AT4G17880/AT3G59400/AT5G49330/AT5G63590/AT5G44190/AT2G16570/AT2G22960/AT1G78600/AT3G62610/AT3G22840/AT1G06000/AT3G21560	16
131	msh4_up	GO:0080167	response to karrikin	13/632	128/21845	8.86042e-05	0.00805683	0.00722489	AT1G61800/AT3G55120/AT5G11260/AT3G17609/AT4G37470/AT3G13790/AT3G60290/AT3G61220/AT1G66390/AT3G21090/AT5G62210/AT3G22840/AT3G21560	13
132	msh4_up	GO:0009415	response to water	26/632	394/21845	9.09092e-05	0.00805683	0.00722489	AT1G64660/AT3G20470/AT3G63060/AT4G29920/AT3G23830/AT3G05640/AT3G57540/AT5G59310/AT2G39800/AT4G25490/AT3G14440/AT4G15910/AT2G35300/AT5G06530/AT2G20880/AT1G12480/AT2G33590/AT2G46140/AT5G62470/AT2G36270/AT1G36060/AT5G59320/AT4G25480/AT3G25760/AT5G57050/AT5G63850	26
133	msh4_up	GO:0009962	regulation of flavonoid biosynthetic process	6/632	27/21845	0.000100863	0.00808029	0.00724592	AT5G11260/AT4G09820/AT2G47460/AT1G56650/AT5G49330/AT3G62610	6
134	msh4_up	GO:0071669	plant-type cell wall organization or biogenesis	21/632	287/21845	0.000102571	0.00808029	0.00724592	AT2G39700/AT4G17880/AT5G48920/AT5G41040/AT1G48100/AT2G37640/AT3G18660/AT1G43790/AT4G23990/AT2G32530/AT3G29810/AT1G21310/AT3G29030/AT1G66230/AT1G12260/AT2G15440/AT1G27930/AT5G03170/AT2G03090/AT4G36160/AT2G38080	21
135	msh4_up	GO:0009451	RNA modification	24/632	354/21845	0.000111214	0.00830006	0.00744301	AT3G20730/AT2G39620/AT3G61170/AT3G23830/AT1G68930/AT2G37320/AT4G08210/AT2G33760/AT2G27610/AT4G18520/AT4G38010/AT3G14730/AT5G13830/AT5G42450/AT1G20230/AT1G74400/AT2G40720/AT1G09220/AT3G25970/AT5G39680/AT1G76120/AT5G59600/AT2G20490/AT3G13880	24
136	msh4_up	GO:0048438	floral whorl development	16/632	191/21845	0.000145643	0.00987149	0.00885217	AT1G75520/AT5G17800/AT2G45650/AT2G22540/AT3G61730/AT2G03710/AT5G14070/AT1G62360/AT4G18570/AT2G31160/AT5G62230/AT4G21330/AT5G07180/AT5G50800/AT3G57920/AT1G69180	16
137	msh4_up	GO:0048580	regulation of post-embryonic development	25/632	383/21845	0.000146193	0.00987149	0.00885217	AT5G11260/AT3G63060/AT2G22840/AT3G17609/AT5G17800/AT3G27785/AT1G20823/AT2G45650/AT1G26310/AT5G24860/AT5G62470/AT2G22540/AT2G36270/AT3G27490/AT5G59990/AT2G21320/AT5G14010/AT1G35730/AT5G44190/AT2G30370/AT1G05100/AT1G78600/AT3G22840/AT1G77110/AT4G25350	25
138	msh4_up	GO:2000652	regulation of secondary cell wall biogenesis	6/632	30/21845	0.000187935	0.0121132	0.0108624	AT4G17880/AT5G48920/AT1G43790/AT1G66230/AT1G12260/AT4G36160	6
139	msh4_up	GO:0048437	floral organ development	18/632	240/21845	0.000232107	0.014182	0.0127176	AT2G41370/AT1G11190/AT1G75520/AT5G17800/AT2G45650/AT3G61730/AT2G03710/AT5G14070/AT1G62360/AT4G18570/AT2G31160/AT5G62230/AT4G21330/AT5G07180/AT3G63010/AT5G50800/AT3G57920/AT1G69180	18
140	msh4_up	GO:0009832	plant-type cell wall biogenesis	15/632	180/21845	0.000246118	0.014182	0.0127176	AT4G17880/AT5G48920/AT5G41040/AT3G18660/AT1G43790/AT4G23990/AT2G32530/AT3G29810/AT1G66230/AT1G12260/AT2G15440/AT1G27930/AT5G03170/AT4G36160/AT2G38080	15
141	msh4_up	GO:0010224	response to UV-B	9/632	73/21845	0.000250036	0.014182	0.0127176	AT3G55120/AT5G11260/AT2G47460/AT3G17609/AT4G15480/AT5G49330/AT4G36220/AT2G22960/AT3G62610	9
142	msh4_up	GO:2000142	regulation of DNA-templated transcription, initiation	5/632	22/21845	0.000349026	0.0190353	0.0170698	AT5G40790/AT5G40800/AT3G27250/AT3G48510/AT5G63350	5
143	msh4_up	GO:1901568	fatty acid derivative metabolic process	7/632	48/21845	0.000431071	0.0226392	0.0203015	AT1G06350/AT5G62470/AT4G33790/AT5G42650/AT1G57750/AT5G22500/AT5G37300	7
144	msh4_up	GO:0010073	meristem maintenance	12/632	134/21845	0.000526817	0.0266795	0.0239246	AT2G41370/AT1G26310/AT2G22540/AT2G03710/AT5G61850/AT1G62360/AT1G71040/AT5G14010/AT1G69120/AT2G31160/AT2G27990/AT1G69180	12
145	msh4_up	GO:0042546	cell wall biogenesis	18/632	262/21845	0.000663012	0.032419	0.0290715	AT4G37800/AT4G17880/AT5G48920/AT2G36870/AT5G41040/AT1G19300/AT3G18660/AT1G43790/AT4G23990/AT2G32530/AT3G29810/AT1G66230/AT1G12260/AT2G15440/AT1G27930/AT5G03170/AT4G36160/AT2G38080	18
146	msh4_up	GO:0009411	response to UV	11/632	122/21845	0.000839548	0.0396826	0.0355851	AT3G55120/AT5G11260/AT2G47460/AT3G17609/AT4G15480/AT5G49330/AT4G36220/AT2G22960/AT1G12370/AT3G62610/AT3G22840	11
147	msh4_up	GO:0009414	response to water deprivation	23/632	385/21845	0.000905506	0.0414196	0.0371427	AT1G64660/AT3G63060/AT4G29920/AT3G23830/AT3G05640/AT3G57540/AT5G59310/AT2G39800/AT4G25490/AT3G14440/AT4G15910/AT2G35300/AT5G06530/AT2G20880/AT2G33590/AT2G46140/AT5G62470/AT2G36270/AT5G59320/AT4G25480/AT3G25760/AT5G57050/AT5G63850	23
148	msh4_up	GO:0006949	syncytium formation	4/632	16/21845	0.000956949	0.0424048	0.0380261	AT2G39700/AT1G14520/AT2G37640/AT2G03090	4
149	msh4_up	GO:1905177	tracheary element differentiation	4/632	17/21845	0.00122295	0.048735	0.0437027	AT5G48920/AT1G43790/AT1G12260/AT4G36160	4
150	msh4_up	GO:0007389	pattern specification process	15/632	210/21845	0.0012302	0.048735	0.0437027	AT2G41370/AT1G19300/AT4G08150/AT1G51460/AT5G28640/AT1G17840/AT1G01380/AT5G55250/AT2G31160/AT3G22810/AT5G57390/AT2G27990/AT1G02800/AT4G14740/AT1G69180	15
151	msh4_up	GO:0019827	stem cell population maintenance	7/632	57/21845	0.00123728	0.048735	0.0437027	AT2G22540/AT2G03710/AT5G61850/AT1G62360/AT1G69120/AT2G31160/AT2G27990	7
152	msh4_up	GO:0098727	maintenance of cell number	7/632	57/21845	0.00123728	0.048735	0.0437027	AT2G22540/AT2G03710/AT5G61850/AT1G62360/AT1G69120/AT2G31160/AT2G27990	7

## Sheet: up_GO_MF
Supplementary Data 1 Enriched GO terms from up- and down-regulated DEGs in WT, mus81 and msh4 after heat stress.
	Cluster	ID	Description	GeneRatio	BgRatio	pvalue	p.adjust	qvalue	geneID	Count
1	Col_up	GO:0051082	unfolded protein binding	17/835	115/21293	2.47501e-06	0.00134393	0.00127919	AT3G12580/AT4G10250/AT1G23100/AT1G53540/AT5G52640/AT5G02490/AT5G54990/AT1G59860/AT5G12030/AT3G07770/AT3G28620/AT4G26780/AT1G07400/AT1G14980/AT4G37910/AT5G12020/AT2G20560	17
2	Col_up	GO:0008509	anion transmembrane transporter activity	30/835	329/21293	1.74321e-05	0.00473282	0.00450483	AT5G14570/AT1G61800/AT3G54830/AT1G27080/AT2G28900/AT2G33260/AT5G17630/AT2G16990/AT1G35350/AT1G12480/AT1G14040/AT1G44100/AT4G19030/AT5G16740/AT4G24570/AT5G40780/AT1G17840/AT3G20240/AT1G20860/AT1G47670/AT2G03260/AT4G10380/AT2G38940/AT2G22500/AT5G63850/AT5G50800/AT5G09470/AT3G45650/AT5G13490/AT2G37890	30
3	Col_up	GO:0005342	organic acid transmembrane transporter activity	15/835	121/21293	7.9224e-05	0.0107547	0.0102366	AT1G61800/AT3G54830/AT2G28900/AT2G33260/AT5G17630/AT1G44100/AT5G16740/AT4G24570/AT5G40780/AT1G17840/AT1G47670/AT2G22500/AT5G63850/AT5G50800/AT5G09470	15
4	Col_up	GO:0046943	carboxylic acid transmembrane transporter activity	15/835	121/21293	7.9224e-05	0.0107547	0.0102366	AT1G61800/AT3G54830/AT2G28900/AT2G33260/AT5G17630/AT1G44100/AT5G16740/AT4G24570/AT5G40780/AT1G17840/AT1G47670/AT2G22500/AT5G63850/AT5G50800/AT5G09470	15
5	Col_up	GO:0003697	single-stranded DNA binding	11/835	79/21293	0.000250093	0.0228852	0.0217827	AT3G23830/AT3G18580/AT5G26860/AT3G05790/AT1G30680/AT3G22880/AT3G52115/AT5G61030/AT4G13850/AT5G61000/AT1G71260	11
6	Col_up	GO:0008514	organic anion transmembrane transporter activity	19/835	195/21293	0.000252875	0.0228852	0.0217827	AT1G61800/AT3G54830/AT2G28900/AT2G33260/AT5G17630/AT2G16990/AT1G44100/AT5G16740/AT4G24570/AT5G40780/AT1G17840/AT3G20240/AT1G47670/AT2G22500/AT5G63850/AT5G50800/AT5G09470/AT5G13490/AT2G37890	19
7	Col_up	GO:0015103	inorganic anion transmembrane transporter activity	14/835	122/21293	0.000308088	0.0238988	0.0227476	AT5G14570/AT1G27080/AT1G35350/AT1G12480/AT1G14040/AT4G19030/AT4G24570/AT1G20860/AT2G03260/AT4G10380/AT2G38940/AT2G22500/AT5G09470/AT3G45650	14
8	mus81_up	GO:0051082	unfolded protein binding	22/729	115/21293	4.71077e-11	2.31299e-08	2.12233e-08	AT3G12580/AT4G10250/AT5G61790/AT3G09440/AT5G52640/AT5G02490/AT1G59860/AT5G42020/AT5G56030/AT5G12030/AT4G24190/AT3G62600/AT3G07770/AT3G28620/AT4G26780/AT1G07400/AT1G14980/AT5G56010/AT2G04030/AT5G09590/AT5G12020/AT2G20560	22
9	mus81_up	GO:0016758	transferase activity, transferring hexosyl groups	40/729	380/21293	3.26646e-10	8.01917e-08	7.35814e-08	AT4G30270/AT5G17030/AT3G46700/AT1G05280/AT4G37800/AT4G16590/AT4G03210/AT4G15480/AT4G27560/AT1G55740/AT3G50760/AT3G23730/AT2G29740/AT2G11810/AT2G16890/AT1G22380/AT1G22015/AT4G14090/AT5G17040/AT1G10550/AT5G12460/AT5G62220/AT2G01850/AT5G03760/AT2G32530/AT2G31750/AT5G05880/AT5G03650/AT5G54690/AT5G15050/AT2G40840/AT5G05900/AT2G33570/AT3G28180/AT5G59590/AT4G34135/AT5G41460/AT2G29750/AT1G06000/AT3G21560	40
10	mus81_up	GO:0080044	quercetin 7-O-glucosyltransferase activity	12/729	54/21293	2.17082e-07	3.55291e-05	3.26004e-05	AT3G46700/AT4G15480/AT2G29740/AT1G22380/AT4G14090/AT2G31750/AT5G05880/AT5G05900/AT5G59590/AT4G34135/AT2G29750/AT3G21560	12
11	mus81_up	GO:0046527	glucosyltransferase activity	22/729	189/21293	5.83469e-07	6.95794e-05	6.38439e-05	AT4G30270/AT5G17030/AT3G46700/AT4G37800/AT4G16590/AT4G03210/AT4G15480/AT3G23730/AT2G29740/AT1G22380/AT4G14090/AT1G10550/AT2G01850/AT2G32530/AT2G31750/AT5G05880/AT5G05900/AT3G28180/AT5G59590/AT4G34135/AT2G29750/AT3G21560	22
12	mus81_up	GO:0020037	heme binding	31/729	338/21293	7.08548e-07	6.95794e-05	6.38439e-05	AT4G10040/AT1G44970/AT5G06730/AT3G61040/AT4G39480/AT2G45570/AT5G19880/AT5G23190/AT5G66390/AT3G19270/AT5G08250/AT1G74110/AT1G77760/AT2G18150/AT2G45970/AT3G28200/AT1G37130/AT5G04630/AT1G05260/AT3G01420/AT5G09970/AT2G27690/AT4G16270/AT2G34490/AT3G48280/AT1G74540/AT5G07990/AT2G24800/AT1G74550/AT3G26125/AT4G36430	31
13	mus81_up	GO:0008194	UDP-glycosyltransferase activity	26/729	264/21293	1.48336e-06	0.000121388	0.000111382	AT5G17030/AT3G46700/AT1G05280/AT4G15480/AT4G27560/AT3G50760/AT2G29740/AT2G11810/AT2G16890/AT1G22380/AT4G14090/AT5G17040/AT5G12460/AT2G32530/AT2G31750/AT5G05880/AT5G54690/AT5G15050/AT5G05900/AT2G33570/AT5G59590/AT4G34135/AT5G41460/AT2G29750/AT1G06000/AT3G21560	26
14	mus81_up	GO:0046906	tetrapyrrole binding	31/729	368/21293	4.22718e-06	0.000296507	0.000272065	AT4G10040/AT1G44970/AT5G06730/AT3G61040/AT4G39480/AT2G45570/AT5G19880/AT5G23190/AT5G66390/AT3G19270/AT5G08250/AT1G74110/AT1G77760/AT2G18150/AT2G45970/AT3G28200/AT1G37130/AT5G04630/AT1G05260/AT3G01420/AT5G09970/AT2G27690/AT4G16270/AT2G34490/AT3G48280/AT1G74540/AT5G07990/AT2G24800/AT1G74550/AT3G26125/AT4G36430	31
15	mus81_up	GO:0080043	quercetin 3-O-glucosyltransferase activity	11/729	63/21293	8.5352e-06	0.000523848	0.000480667	AT5G17030/AT3G46700/AT4G15480/AT2G29740/AT1G22380/AT4G14090/AT2G31750/AT5G05880/AT5G05900/AT5G59590/AT3G21560	11
16	mus81_up	GO:0044183	protein folding chaperone	6/729	25/21293	0.00015998	0.00872782	0.00800837	AT3G12580/AT3G09440/AT5G02490/AT5G42020/AT4G29520/AT5G09590	6
17	mus81_up	GO:0035251	UDP-glucosyltransferase activity	14/729	137/21293	0.000260984	0.0128143	0.011758	AT5G17030/AT3G46700/AT4G15480/AT2G29740/AT1G22380/AT4G14090/AT2G32530/AT2G31750/AT5G05880/AT5G05900/AT5G59590/AT4G34135/AT2G29750/AT3G21560	14
18	mus81_up	GO:0016705	oxidoreductase activity, acting on paired donors, with incorporation or reduction of molecular oxygen	26/729	363/21293	0.000346451	0.0154643	0.0141896	AT4G27030/AT3G61040/AT4G39480/AT2G45570/AT5G23190/AT3G19270/AT5G08250/AT1G74110/AT1G06120/AT4G32540/AT2G45970/AT5G63590/AT5G04630/AT5G09970/AT2G27690/AT2G34490/AT3G15870/AT3G48280/AT5G16230/AT1G74540/AT4G21200/AT5G07990/AT1G74550/AT1G62540/AT3G26125/AT4G03070	26
19	mus81_up	GO:0008509	anion transmembrane transporter activity	24/729	329/21293	0.00044384	0.0181605	0.0166635	AT5G14570/AT1G61800/AT2G34390/AT3G54830/AT1G12110/AT1G27080/AT2G28900/AT5G02170/AT2G16990/AT1G35350/AT1G71890/AT1G12480/AT5G16740/AT1G26730/AT1G10010/AT1G17840/AT3G27170/AT1G20860/AT5G25400/AT4G10380/AT2G22500/AT5G50800/AT5G09470/AT5G13490	24
20	mus81_up	GO:0051787	misfolded protein binding	5/729	21/21293	0.000597986	0.0225855	0.0207237	AT3G12580/AT3G09440/AT5G02490/AT5G42020/AT5G09590	5
21	mus81_up	GO:0016762	xyloglucan:xyloglucosyl transferase activity	6/729	33/21293	0.000792562	0.0277963	0.025505	AT4G30270/AT4G37800/AT4G03210/AT3G23730/AT1G10550/AT2G01850	6
22	mus81_up	GO:0005342	organic acid transmembrane transporter activity	12/729	121/21293	0.000918715	0.0281931	0.0258691	AT1G61800/AT2G34390/AT3G54830/AT2G28900/AT5G02170/AT1G71890/AT5G16740/AT1G10010/AT1G17840/AT2G22500/AT5G50800/AT5G09470	12
23	mus81_up	GO:0046943	carboxylic acid transmembrane transporter activity	12/729	121/21293	0.000918715	0.0281931	0.0258691	AT1G61800/AT2G34390/AT3G54830/AT2G28900/AT5G02170/AT1G71890/AT5G16740/AT1G10010/AT1G17840/AT2G22500/AT5G50800/AT5G09470	12
24	mus81_up	GO:0004601	peroxidase activity	11/729	110/21293	0.00138418	0.0399785	0.036683	AT1G44970/AT5G06730/AT5G19880/AT5G66390/AT2G18150/AT3G17790/AT3G28200/AT1G05260/AT4G16270/AT2G24800/AT4G36430	11
25	mus81_up	GO:0004553	hydrolase activity, hydrolyzing O-glycosyl compounds	24/729	359/21293	0.00148877	0.0406102	0.0372627	AT4G30270/AT4G36360/AT4G11050/AT2G44460/AT4G37800/AT4G01700/AT4G03210/AT2G19440/AT1G02640/AT4G19810/AT3G23730/AT1G10550/AT4G15210/AT3G26130/AT2G01850/AT4G24260/AT5G03650/AT3G26140/AT1G70500/AT4G21760/AT5G20330/AT2G43870/AT3G18080/AT4G39010	24
26	mus81_up	GO:0031072	heat shock protein binding	6/729	38/21293	0.00170894	0.0441625	0.0405221	AT3G12580/AT3G09440/AT4G12400/AT5G02490/AT5G42020/AT5G09590	6

## Sheet: up_GO_CC
Supplementary Data 1 Enriched GO terms from up- and down-regulated DEGs in WT, mus81 and msh4 after heat stress.
	Cluster	ID	Description	GeneRatio	BgRatio	pvalue	p.adjust	qvalue	geneID	Count
1	Col_up	GO:0031225	anchored component of membrane	34/1013	304/25408	6.67476e-08	1.66201e-05	1.6441e-05	AT5G07190/AT2G44290/AT3G15800/AT5G67460/AT1G32860/AT1G21880/AT5G14150/AT2G19440/AT5G25090/AT2G25060/AT2G04780/AT1G64760/AT3G06360/AT2G13820/AT3G60280/AT1G73890/AT5G06320/AT3G61640/AT4G32490/AT5G62210/AT3G29810/AT1G24140/AT1G07135/AT4G25240/AT4G28560/AT3G43960/AT1G29980/AT1G20030/AT5G11740/AT5G64310/AT5G07475/AT5G20330/AT2G27035/AT3G58100	34
2	Col_up	GO:0046658	anchored component of plasma membrane	19/1013	163/25408	2.86467e-05	0.00356651	0.00352806	AT3G15800/AT5G67460/AT1G32860/AT1G21880/AT2G19440/AT5G25090/AT2G25060/AT2G04780/AT1G64760/AT2G13820/AT3G60280/AT5G06320/AT4G32490/AT3G29810/AT4G25240/AT5G07475/AT5G20330/AT2G27035/AT3G58100	19
3	Col_up	GO:0005759	mitochondrial matrix	14/1013	124/25408	0.000433591	0.0359881	0.0356001	AT5G60730/AT3G18580/AT1G23100/AT5G26860/AT3G05790/AT3G23990/AT1G17560/AT1G64880/AT1G15870/AT5G02050/AT4G26780/AT1G14980/AT4G37910/AT1G31760	14
4	mus81_up	GO:0031225	anchored component of membrane	34/847	304/25408	7.95779e-10	1.47219e-07	1.46591e-07	AT1G72230/AT1G70985/AT5G07190/AT2G44290/AT1G03870/AT3G44220/AT5G14150/AT2G19440/AT1G59970/AT1G64640/AT3G06360/AT4G12730/AT3G60280/AT2G23130/AT1G73890/AT1G23040/AT1G79800/AT4G09030/AT5G65390/AT5G53870/AT5G62210/AT2G28410/AT1G55330/AT3G29810/AT1G24140/AT4G28560/AT3G43960/AT5G11740/AT4G16140/AT5G07475/AT5G20330/AT2G27035/AT3G13520/AT5G44130	34
5	mus81_up	GO:0009505	plant-type cell wall	23/847	226/25408	2.24712e-06	0.000207859	0.000206972	AT4G30270/AT4G36360/AT2G28950/AT5G61790/AT2G33530/AT4G13340/AT1G04980/AT1G35140/AT4G08950/AT1G02640/AT3G45230/AT5G44700/AT3G45970/AT3G28200/AT1G05260/AT4G20140/AT2G24800/AT2G45890/AT4G38400/AT3G24480/AT3G49220/AT3G18080/AT5G44130	23
6	mus81_up	GO:0009986	cell surface	5/847	19/25408	0.000320401	0.0170495	0.0169767	AT5G52640/AT5G56030/AT3G17790/AT1G17840/AT5G56010	5
7	mus81_up	GO:0031226	intrinsic component of plasma membrane	23/847	313/25408	0.000368637	0.0170495	0.0169767	AT1G72230/AT1G03870/AT3G51490/AT1G08930/AT3G44220/AT2G19440/AT1G64640/AT1G71890/AT4G12730/AT3G60280/AT1G10550/AT1G64780/AT3G05165/AT1G79800/AT5G53870/AT5G51060/AT3G29810/AT5G13170/AT5G07475/AT5G20330/AT2G27035/AT5G50800/AT5G44130	23
8	mus81_up	GO:0099503	secretory vesicle	15/847	172/25408	0.00067114	0.0248322	0.0247262	AT4G30270/AT1G29660/AT4G13340/AT1G03870/AT4G19810/AT5G42020/AT4G15210/AT4G24190/AT3G45970/AT3G07470/AT2G10940/AT5G56010/AT3G11700/AT1G77510/AT1G41830	15
9	mus81_up	GO:0046658	anchored component of plasma membrane	14/847	163/25408	0.00115973	0.0329668	0.0328261	AT1G72230/AT1G03870/AT3G44220/AT2G19440/AT1G64640/AT4G12730/AT3G60280/AT1G79800/AT5G53870/AT3G29810/AT5G07475/AT5G20330/AT2G27035/AT5G44130	14
10	mus81_up	GO:0048471	perinuclear region of cytoplasm	4/847	15/25408	0.00124739	0.0329668	0.0328261	AT5G52640/AT5G56030/AT4G24190/AT5G56010	4

## Sheet: dw_GO_BP
Supplementary Data 1 Enriched GO terms from up- and down-regulated DEGs in WT, mus81 and msh4 after heat stress.
	Cluster	ID	Description	GeneRatio	BgRatio	pvalue	p.adjust	qvalue	geneID	Count
1	Col_down	GO:0016054	organic acid catabolic process	25/1246	161/21845	4.76e-06	0.00384597	0.00366987	AT5G53970/AT5G14780/AT1G03090/AT2G34555/AT2G37040/AT3G10340/AT5G34780/AT3G51840/AT3G13450/AT2G22330/AT3G47340/AT2G14170/AT3G45300/AT1G06570/AT5G54080/AT5G04230/AT1G47990/AT1G08630/AT3G17760/AT5G47720/AT5G06580/AT2G35690/AT1G78440/AT3G30775/AT5G07440	25
2	Col_down	GO:0046395	carboxylic acid catabolic process	25/1246	161/21845	4.76e-06	0.00384597	0.00366987	AT5G53970/AT5G14780/AT1G03090/AT2G34555/AT2G37040/AT3G10340/AT5G34780/AT3G51840/AT3G13450/AT2G22330/AT3G47340/AT2G14170/AT3G45300/AT1G06570/AT5G54080/AT5G04230/AT1G47990/AT1G08630/AT3G17760/AT5G47720/AT5G06580/AT2G35690/AT1G78440/AT3G30775/AT5G07440	25
3	Col_down	GO:0044282	small molecule catabolic process	31/1246	238/21845	1.54e-05	0.00661285	0.00631006	AT5G53970/AT5G14780/AT1G03090/AT2G19800/AT2G34555/AT2G37040/AT3G10340/AT5G34780/AT3G51840/AT3G13450/AT2G22330/AT2G31830/AT3G47340/AT2G14170/AT3G45300/AT1G06570/AT5G42250/AT5G54080/AT5G04230/AT1G47990/AT1G08630/AT4G26260/AT3G17760/AT5G47720/AT5G18860/AT5G06580/AT2G35690/AT1G78440/AT3G30775/AT5G07440/AT1G47510	31
4	Col_down	GO:0042445	hormone metabolic process	35/1246	285/21845	1.64e-05	0.00661285	0.00631006	AT2G43820/AT1G12010/AT2G34555/AT2G37040/AT5G25620/AT5G17300/AT2G22810/AT4G29740/AT3G53450/AT2G22330/AT2G23590/AT3G44970/AT1G73340/AT1G17060/AT2G23560/AT2G23600/AT2G03760/AT3G19820/AT1G47990/AT4G16690/AT5G05690/AT2G26710/AT3G04070/AT3G03990/AT5G20960/AT5G58310/AT2G36690/AT2G23550/AT2G23610/AT5G56970/AT2G35690/AT1G78440/AT1G26360/AT1G55320/AT5G07010	35
5	Col_down	GO:0009063	cellular amino acid catabolic process	17/1246	96/21845	2.76e-05	0.00891249	0.0085044	AT5G53970/AT1G03090/AT2G37040/AT3G10340/AT5G34780/AT3G13450/AT2G22330/AT3G47340/AT2G14170/AT3G45300/AT1G06570/AT5G54080/AT5G04230/AT1G08630/AT3G17760/AT3G30775/AT5G07440	17
6	Col_down	GO:0009646	response to absence of light	11/1246	49/21845	7.79e-05	0.0209781	0.0200175	AT3G48390/AT2G38230/AT3G13450/AT3G47340/AT3G12820/AT4G24230/AT1G58340/AT5G63190/AT2G37678/AT1G04400/AT3G06850	11
7	Col_down	GO:0010817	regulation of hormone levels	40/1246	375/21845	0.000108699	0.0223324	0.0213098	AT2G43820/AT1G12010/AT5G13930/AT2G34555/AT2G37040/AT5G25620/AT5G17300/AT2G22810/AT2G01420/AT4G29740/AT3G53450/AT2G22330/AT1G28230/AT2G23590/AT3G44970/AT1G73340/AT1G17060/AT2G23560/AT2G23600/AT2G03760/AT3G19820/AT1G47990/AT4G16690/AT5G05690/AT2G26710/AT3G04070/AT3G03990/AT5G20960/AT5G58310/AT2G36690/AT1G16510/AT3G62150/AT2G23550/AT2G23610/AT5G56970/AT2G35690/AT1G78440/AT1G26360/AT1G55320/AT5G07010	40
8	Col_down	GO:0009074	aromatic amino acid family catabolic process	7/1246	21/21845	0.000110625	0.0223324	0.0213098	AT5G53970/AT2G37040/AT3G10340/AT2G22330/AT1G06570/AT5G54080/AT5G04230	7
9	Col_down	GO:0009638	phototropism	7/1246	22/21845	0.00015429	0.026982	0.0257466	AT3G45780/AT2G02950/AT2G30520/AT1G14280/AT5G58140/AT1G18810/AT1G04400	7
10	Col_down	GO:0042537	benzene-containing compound metabolic process	13/1246	71/21845	0.000167071	0.026982	0.0257466	AT2G43820/AT2G37040/AT3G10340/AT2G23590/AT5G54080/AT5G04230/AT2G23560/AT2G23600/AT4G16690/AT5G58310/AT2G23550/AT2G23610/AT1G26360	13
11	Col_down	GO:0007623	circadian rhythm	20/1246	145/21845	0.00022011	0.0296232	0.0282668	AT3G48100/AT3G45780/AT3G26740/AT3G09600/AT3G48360/AT5G17300/AT1G01060/AT3G01060/AT5G06980/AT5G28770/AT5G15850/AT5G02840/AT5G10140/AT5G58140/AT1G10470/AT5G24930/AT2G46830/AT5G25830/AT1G04400/AT5G64940	20
12	Col_down	GO:0048511	rhythmic process	20/1246	145/21845	0.00022011	0.0296232	0.0282668	AT3G48100/AT3G45780/AT3G26740/AT3G09600/AT3G48360/AT5G17300/AT1G01060/AT3G01060/AT5G06980/AT5G28770/AT5G15850/AT5G02840/AT5G10140/AT5G58140/AT1G10470/AT5G24930/AT2G46830/AT5G25830/AT1G04400/AT5G64940	20
13	Col_down	GO:0018958	phenol-containing compound metabolic process	12/1246	65/21845	0.000272126	0.0298978	0.0285288	AT2G43820/AT2G37040/AT4G22880/AT2G23590/AT5G54080/AT2G23560/AT2G23600/AT4G16690/AT5G58310/AT2G23550/AT2G23610/AT1G26360	12
14	Col_down	GO:0009415	response to water	40/1246	394/21845	0.000306687	0.0298978	0.0285288	AT3G61890/AT5G58070/AT3G23050/AT4G39090/AT2G37040/AT5G25620/AT1G35720/AT3G27690/AT1G52690/AT5G23010/AT1G56600/AT5G66400/AT1G68010/AT2G37180/AT4G23450/AT5G13330/AT3G19600/AT2G18050/AT2G40880/AT3G50970/AT5G61590/AT1G02820/AT2G37170/AT4G17870/AT1G22890/AT5G25370/AT5G65730/AT1G56280/AT3G53420/AT3G04070/AT2G05620/AT4G27410/AT1G16060/AT3G15500/AT2G05520/AT3G30775/AT1G07240/AT1G04400/AT1G43160/AT3G61430	40
15	Col_down	GO:0009696	salicylic acid metabolic process	10/1246	48/21845	0.000314853	0.0298978	0.0285288	AT2G43820/AT2G37040/AT2G23590/AT2G23560/AT2G23600/AT4G16690/AT5G58310/AT2G23550/AT2G23610/AT1G26360	10
16	Col_down	GO:0046323	glucose import	10/1246	48/21845	0.000314853	0.0298978	0.0285288	AT4G36670/AT1G34580/AT1G08900/AT1G30220/AT1G54730/AT3G05160/AT2G48020/AT1G07340/AT1G11260/AT4G16480	10
17	Col_down	GO:0006559	L-phenylalanine catabolic process	5/1246	12/21845	0.000338399	0.0298978	0.0285288	AT2G37040/AT3G10340/AT1G06570/AT5G54080/AT5G04230	5
18	Col_down	GO:1902222	erythrose 4-phosphate/phosphoenolpyruvate family amino acid catabolic process	5/1246	12/21845	0.000338399	0.0298978	0.0285288	AT2G37040/AT3G10340/AT1G06570/AT5G54080/AT5G04230	5
19	Col_down	GO:0009414	response to water deprivation	39/1246	385/21845	0.00037872	0.0298978	0.0285288	AT3G61890/AT5G58070/AT3G23050/AT4G39090/AT2G37040/AT5G25620/AT1G35720/AT3G27690/AT1G52690/AT5G23010/AT1G56600/AT5G66400/AT1G68010/AT2G37180/AT4G23450/AT5G13330/AT3G19600/AT2G18050/AT2G40880/AT3G50970/AT5G61590/AT1G02820/AT2G37170/AT4G17870/AT1G22890/AT5G25370/AT5G65730/AT1G56280/AT3G53420/AT2G05620/AT4G27410/AT1G16060/AT3G15500/AT2G05520/AT3G30775/AT1G07240/AT1G04400/AT1G43160/AT3G61430	39
20	Col_down	GO:0016999	antibiotic metabolic process	17/1246	118/21845	0.000379455	0.0298978	0.0285288	AT5G14780/AT2G43820/AT2G37040/AT2G23590/AT1G65990/AT4G23450/AT5G42250/AT1G20620/AT2G23560/AT2G23600/AT4G35090/AT4G16690/AT5G58310/AT5G10530/AT2G23550/AT2G23610/AT1G26360	17
21	Col_down	GO:1901606	alpha-amino acid catabolic process	14/1246	87/21845	0.000388763	0.0298978	0.0285288	AT5G53970/AT1G03090/AT2G37040/AT3G10340/AT2G22330/AT2G14170/AT3G45300/AT1G06570/AT5G54080/AT5G04230/AT1G08630/AT3G17760/AT3G30775/AT5G07440	14
22	Col_down	GO:0009642	response to light intensity	20/1246	153/21845	0.000451047	0.0331109	0.0315949	AT3G48390/AT1G03600/AT5G58070/AT2G38230/AT3G47470/AT3G27690/AT3G13450/AT3G47340/AT1G34000/AT3G12820/AT4G24230/AT1G58340/AT3G59220/AT1G02340/AT5G63190/AT2G37678/AT2G05620/AT1G04400/AT5G64940/AT3G06850	20
23	Col_down	GO:1904659	glucose transmembrane transport	10/1246	51/21845	0.000526547	0.0369728	0.0352799	AT4G36670/AT1G34580/AT1G08900/AT1G30220/AT1G54730/AT3G05160/AT2G48020/AT1G07340/AT1G11260/AT4G16480	10
24	Col_down	GO:0009698	phenylpropanoid metabolic process	17/1246	122/21845	0.00056284	0.0378745	0.0361403	AT5G13930/AT2G37040/AT3G10340/AT4G22880/AT2G22990/AT1G61820/AT1G80440/AT3G59940/AT1G31720/AT3G11980/AT5G04230/AT3G16340/AT3G19820/AT1G15670/AT3G19450/AT1G61810/AT2G44130	17
25	Col_down	GO:0042447	hormone catabolic process	6/1246	20/21845	0.000659555	0.0426073	0.0406564	AT2G34555/AT2G37040/AT4G29740/AT1G47990/AT5G56970/AT1G78440	6
26	Col_down	GO:0008645	hexose transmembrane transport	10/1246	53/21845	0.000724548	0.0450056	0.0429449	AT4G36670/AT1G34580/AT1G08900/AT1G30220/AT1G54730/AT3G05160/AT2G48020/AT1G07340/AT1G11260/AT4G16480	10
27	mus81_down	GO:0071456	cellular response to hypoxia	36/1013	238/21845	3.87e-10	2.54e-07	2.44e-07	AT4G38470/AT1G72910/AT1G77120/AT5G58070/AT1G25560/AT3G06435/AT4G32480/AT4G27460/AT1G30040/AT5G15120/AT1G68670/AT4G27450/AT1G78850/AT5G41080/AT5G59820/AT5G19240/AT1G19530/AT5G20250/AT5G42200/AT4G24230/AT1G73500/AT1G26800/AT5G45630/AT1G03610/AT3G56400/AT5G64260/AT3G10020/AT5G65207/AT1G10140/AT3G07350/AT4G31970/AT5G19120/AT3G30775/AT4G13395/AT2G15890/AT1G15010	36
28	mus81_down	GO:0036294	cellular response to decreased oxygen levels	36/1013	240/21845	4.9e-10	2.54e-07	2.44e-07	AT4G38470/AT1G72910/AT1G77120/AT5G58070/AT1G25560/AT3G06435/AT4G32480/AT4G27460/AT1G30040/AT5G15120/AT1G68670/AT4G27450/AT1G78850/AT5G41080/AT5G59820/AT5G19240/AT1G19530/AT5G20250/AT5G42200/AT4G24230/AT1G73500/AT1G26800/AT5G45630/AT1G03610/AT3G56400/AT5G64260/AT3G10020/AT5G65207/AT1G10140/AT3G07350/AT4G31970/AT5G19120/AT3G30775/AT4G13395/AT2G15890/AT1G15010	36
29	mus81_down	GO:0071453	cellular response to oxygen levels	36/1013	240/21845	4.9e-10	2.54e-07	2.44e-07	AT4G38470/AT1G72910/AT1G77120/AT5G58070/AT1G25560/AT3G06435/AT4G32480/AT4G27460/AT1G30040/AT5G15120/AT1G68670/AT4G27450/AT1G78850/AT5G41080/AT5G59820/AT5G19240/AT1G19530/AT5G20250/AT5G42200/AT4G24230/AT1G73500/AT1G26800/AT5G45630/AT1G03610/AT3G56400/AT5G64260/AT3G10020/AT5G65207/AT1G10140/AT3G07350/AT4G31970/AT5G19120/AT3G30775/AT4G13395/AT2G15890/AT1G15010	36
30	mus81_down	GO:0001666	response to hypoxia	36/1013	264/21845	6.77e-09	2.63e-06	2.53e-06	AT4G38470/AT1G72910/AT1G77120/AT5G58070/AT1G25560/AT3G06435/AT4G32480/AT4G27460/AT1G30040/AT5G15120/AT1G68670/AT4G27450/AT1G78850/AT5G41080/AT5G59820/AT5G19240/AT1G19530/AT5G20250/AT5G42200/AT4G24230/AT1G73500/AT1G26800/AT5G45630/AT1G03610/AT3G56400/AT5G64260/AT3G10020/AT5G65207/AT1G10140/AT3G07350/AT4G31970/AT5G19120/AT3G30775/AT4G13395/AT2G15890/AT1G15010	36
31	mus81_down	GO:0036293	response to decreased oxygen levels	36/1013	268/21845	1.01e-08	2.9e-06	2.79e-06	AT4G38470/AT1G72910/AT1G77120/AT5G58070/AT1G25560/AT3G06435/AT4G32480/AT4G27460/AT1G30040/AT5G15120/AT1G68670/AT4G27450/AT1G78850/AT5G41080/AT5G59820/AT5G19240/AT1G19530/AT5G20250/AT5G42200/AT4G24230/AT1G73500/AT1G26800/AT5G45630/AT1G03610/AT3G56400/AT5G64260/AT3G10020/AT5G65207/AT1G10140/AT3G07350/AT4G31970/AT5G19120/AT3G30775/AT4G13395/AT2G15890/AT1G15010	36
32	mus81_down	GO:0070482	response to oxygen levels	36/1013	269/21845	1.12e-08	2.9e-06	2.79e-06	AT4G38470/AT1G72910/AT1G77120/AT5G58070/AT1G25560/AT3G06435/AT4G32480/AT4G27460/AT1G30040/AT5G15120/AT1G68670/AT4G27450/AT1G78850/AT5G41080/AT5G59820/AT5G19240/AT1G19530/AT5G20250/AT5G42200/AT4G24230/AT1G73500/AT1G26800/AT5G45630/AT1G03610/AT3G56400/AT5G64260/AT3G10020/AT5G65207/AT1G10140/AT3G07350/AT4G31970/AT5G19120/AT3G30775/AT4G13395/AT2G15890/AT1G15010	36
33	mus81_down	GO:0045490	pectin catabolic process	20/1013	96/21845	1.33e-08	2.95e-06	2.84e-06	AT5G07410/AT2G19150/AT1G14420/AT5G15110/AT5G61680/AT5G27870/AT3G43270/AT4G22090/AT3G05610/AT5G07430/AT5G55720/AT3G17060/AT3G62170/AT2G26450/AT2G47040/AT4G15980/AT3G01270/AT4G33230/AT2G47030/AT2G02720	20
34	mus81_down	GO:0080092	regulation of pollen tube growth	12/1013	36/21845	4.13e-08	8.02e-06	7.72e-06	AT1G50610/AT2G32460/AT2G31500/AT4G39110/AT5G12180/AT2G07040/AT2G33775/AT1G79860/AT4G13240/AT3G42880/AT1G28270/AT3G20190	12
35	mus81_down	GO:0010769	regulation of cell morphogenesis involved in differentiation	12/1013	40/21845	1.55e-07	2.41e-05	2.32e-05	AT1G50610/AT2G32460/AT2G31500/AT4G39110/AT5G12180/AT2G07040/AT2G33775/AT1G79860/AT4G13240/AT3G42880/AT1G28270/AT3G20190	12
36	mus81_down	GO:0060284	regulation of cell development	12/1013	40/21845	1.55e-07	2.41e-05	2.32e-05	AT1G50610/AT2G32460/AT2G31500/AT4G39110/AT5G12180/AT2G07040/AT2G33775/AT1G79860/AT4G13240/AT3G42880/AT1G28270/AT3G20190	12
37	mus81_down	GO:0000272	polysaccharide catabolic process	22/1013	135/21845	2.63e-07	3.72e-05	3.58e-05	AT5G07410/AT2G19150/AT1G14420/AT5G15110/AT5G61680/AT5G27870/AT3G43270/AT4G22090/AT3G05610/AT5G07430/AT5G55720/AT3G17060/AT3G62170/AT2G26450/AT3G47010/AT2G47040/AT3G62710/AT4G15980/AT3G01270/AT4G33230/AT2G47030/AT2G02720	22
38	mus81_down	GO:0016052	carbohydrate catabolic process	29/1013	221/21845	4.46e-07	5.78e-05	5.56e-05	AT5G07410/AT4G26390/AT2G19150/AT2G19800/AT1G14420/AT5G15110/AT5G61680/AT5G27870/AT3G43270/AT4G22090/AT3G05610/AT3G57520/AT5G07430/AT5G55720/AT3G47800/AT3G17060/AT3G62170/AT4G26260/AT3G06500/AT2G26450/AT3G47010/AT4G24040/AT2G47040/AT3G62710/AT4G15980/AT3G01270/AT4G33230/AT2G47030/AT2G02720	29
39	mus81_down	GO:0042737	drug catabolic process	25/1013	175/21845	5.55e-07	6.64e-05	6.38e-05	AT5G07410/AT2G19150/AT1G14420/AT5G15110/AT2G37040/AT5G61680/AT5G27870/AT3G43270/AT4G22090/AT3G05610/AT5G07430/AT1G06570/AT5G55720/AT1G60740/AT1G20620/AT3G17060/AT3G62170/AT5G43600/AT2G26450/AT2G47040/AT4G15980/AT3G01270/AT4G33230/AT2G47030/AT2G02720	25
40	mus81_down	GO:0048868	pollen tube development	28/1013	217/21845	9.88e-07	0.00010969	0.000105506	AT3G05770/AT5G52360/AT1G50610/AT1G10770/AT2G32460/AT3G01700/AT2G31500/AT5G28680/AT4G39110/AT5G12180/AT1G48020/AT2G07040/AT5G16500/AT1G03050/AT2G33775/AT1G79860/AT3G02810/AT4G33970/AT5G20690/AT4G13240/AT3G42880/AT2G47040/AT1G28270/AT5G14380/AT1G05580/AT3G20190/AT5G16490/AT2G15890	28
41	mus81_down	GO:0009860	pollen tube growth	22/1013	160/21845	4.95e-06	0.000513054	0.000493489	AT5G52360/AT1G50610/AT1G10770/AT2G32460/AT3G01700/AT2G31500/AT5G28680/AT4G39110/AT5G12180/AT1G48020/AT2G07040/AT1G03050/AT2G33775/AT1G79860/AT4G33970/AT4G13240/AT3G42880/AT2G47040/AT1G28270/AT5G14380/AT3G20190/AT5G16490	22
42	mus81_down	GO:0046323	glucose import	11/1013	48/21845	9.4e-06	0.000913387	0.000878554	AT3G05150/AT4G36670/AT1G08900/AT3G19930/AT5G23270/AT1G54730/AT3G05160/AT5G26340/AT1G07340/AT1G11260/AT4G16480	11
43	mus81_down	GO:0009856	pollination	32/1013	301/21845	1.16e-05	0.00100437	0.000966068	AT3G05770/AT5G52360/AT5G07410/AT1G50610/AT1G10770/AT2G33100/AT2G32460/AT3G01700/AT2G31500/AT5G28680/AT4G39110/AT5G12180/AT1G48020/AT2G07040/AT4G11900/AT4G38190/AT5G16500/AT1G03050/AT2G33775/AT1G79860/AT3G02810/AT4G33970/AT5G20690/AT4G13240/AT3G42880/AT2G47040/AT1G28270/AT5G14380/AT1G05580/AT3G20190/AT5G16490/AT2G15890	32
44	mus81_down	GO:0044706	multi-multicellular organism process	32/1013	301/21845	1.16e-05	0.00100437	0.000966068	AT3G05770/AT5G52360/AT5G07410/AT1G50610/AT1G10770/AT2G33100/AT2G32460/AT3G01700/AT2G31500/AT5G28680/AT4G39110/AT5G12180/AT1G48020/AT2G07040/AT4G11900/AT4G38190/AT5G16500/AT1G03050/AT2G33775/AT1G79860/AT3G02810/AT4G33970/AT5G20690/AT4G13240/AT3G42880/AT2G47040/AT1G28270/AT5G14380/AT1G05580/AT3G20190/AT5G16490/AT2G15890	32
45	mus81_down	GO:1904659	glucose transmembrane transport	11/1013	51/21845	1.75e-05	0.00142728	0.00137285	AT3G05150/AT4G36670/AT1G08900/AT3G19930/AT5G23270/AT1G54730/AT3G05160/AT5G26340/AT1G07340/AT1G11260/AT4G16480	11
46	mus81_down	GO:0045488	pectin metabolic process	21/1013	163/21845	2.22e-05	0.00172471	0.00165894	AT5G07410/AT2G19150/AT1G14420/AT5G15110/AT5G61680/AT3G06260/AT5G27870/AT3G43270/AT4G22090/AT3G05610/AT5G07430/AT5G55720/AT3G17060/AT3G62170/AT2G26450/AT2G47040/AT4G15980/AT3G01270/AT4G33230/AT2G47030/AT2G02720	21
47	mus81_down	GO:0010393	galacturonan metabolic process	21/1013	164/21845	2.44e-05	0.00180303	0.00173427	AT5G07410/AT2G19150/AT1G14420/AT5G15110/AT5G61680/AT3G06260/AT5G27870/AT3G43270/AT4G22090/AT3G05610/AT5G07430/AT5G55720/AT3G17060/AT3G62170/AT2G26450/AT2G47040/AT4G15980/AT3G01270/AT4G33230/AT2G47030/AT2G02720	21
48	mus81_down	GO:0008645	hexose transmembrane transport	11/1013	53/21845	2.57e-05	0.00181229	0.00174317	AT3G05150/AT4G36670/AT1G08900/AT3G19930/AT5G23270/AT1G54730/AT3G05160/AT5G26340/AT1G07340/AT1G11260/AT4G16480	11
49	mus81_down	GO:0015749	monosaccharide transmembrane transport	11/1013	54/21845	3.09e-05	0.00208654	0.00200697	AT3G05150/AT4G36670/AT1G08900/AT3G19930/AT5G23270/AT1G54730/AT3G05160/AT5G26340/AT1G07340/AT1G11260/AT4G16480	11
50	mus81_down	GO:0009932	cell tip growth	22/1013	186/21845	5.41e-05	0.00350436	0.00337072	AT5G52360/AT1G50610/AT1G10770/AT2G32460/AT3G01700/AT2G31500/AT5G28680/AT4G39110/AT5G12180/AT1G48020/AT2G07040/AT1G03050/AT2G33775/AT1G79860/AT4G33970/AT4G13240/AT3G42880/AT2G47040/AT1G28270/AT5G14380/AT3G20190/AT5G16490	22
51	mus81_down	GO:0009646	response to absence of light	10/1013	49/21845	6.94e-05	0.00431335	0.00414886	AT3G48390/AT2G38230/AT3G13450/AT3G47340/AT5G42900/AT4G24230/AT5G63190/AT2G37678/AT4G02380/AT1G04400	10
52	mus81_down	GO:0048588	developmental cell growth	24/1013	219/21845	8.66e-05	0.00517579	0.0049784	AT5G52360/AT1G50610/AT1G10770/AT2G32460/AT3G01700/AT2G31500/AT5G28680/AT4G39110/AT5G12180/AT1G48020/AT2G07040/AT5G56540/AT1G03050/AT2G33775/AT1G79860/AT4G33970/AT4G13240/AT3G06810/AT3G42880/AT2G47040/AT1G28270/AT5G14380/AT3G20190/AT5G16490	24
53	mus81_down	GO:0051510	regulation of unidimensional cell growth	12/1013	72/21845	0.000108702	0.00625642	0.00601783	AT1G50610/AT2G32460/AT2G31500/AT4G39110/AT5G12180/AT2G07040/AT2G33775/AT1G79860/AT4G13240/AT3G42880/AT1G28270/AT3G20190	12
54	mus81_down	GO:0045595	regulation of cell differentiation	12/1013	73/21845	0.00012467	0.00691921	0.00665534	AT1G50610/AT2G32460/AT2G31500/AT4G39110/AT5G12180/AT2G07040/AT2G33775/AT1G79860/AT4G13240/AT3G42880/AT1G28270/AT3G20190	12
55	mus81_down	GO:0034219	carbohydrate transmembrane transport	11/1013	63/21845	0.000135722	0.0072728	0.00699545	AT3G05150/AT4G36670/AT1G08900/AT3G19930/AT5G23270/AT1G54730/AT3G05160/AT5G26340/AT1G07340/AT1G11260/AT4G16480	11
56	mus81_down	GO:0043900	regulation of multi-organism process	13/1013	91/21845	0.000283423	0.0146813	0.0141214	AT1G50610/AT2G32460/AT2G31500/AT4G39110/AT5G12180/AT2G07040/AT2G33775/AT1G79860/AT4G13240/AT3G42880/AT1G28270/AT5G17340/AT3G20190	13
57	mus81_down	GO:0009414	response to water deprivation	33/1013	385/21845	0.000544558	0.0272981	0.0262571	AT3G61890/AT5G13750/AT1G77120/AT5G58070/AT4G39090/AT2G37040/AT2G38750/AT1G35720/AT4G25490/AT2G21620/AT5G23010/AT1G56600/AT5G58670/AT4G26070/AT3G19600/AT3G50970/AT5G61590/AT5G26340/AT2G37170/AT4G17870/AT5G25370/AT5G65730/AT3G56400/AT4G02380/AT4G27410/AT1G52890/AT3G15500/AT2G05520/AT3G30775/AT1G07240/AT5G66880/AT1G04400/AT3G61430	33
58	mus81_down	GO:0008643	carbohydrate transport	13/1013	98/21845	0.000589611	0.028633	0.0275411	AT1G22710/AT3G05150/AT1G35720/AT4G36670/AT1G08900/AT3G19930/AT5G23270/AT1G54730/AT3G05160/AT5G26340/AT1G07340/AT1G11260/AT4G16480	13
59	mus81_down	GO:0009415	response to water	33/1013	394/21845	0.000811013	0.0381322	0.036678	AT3G61890/AT5G13750/AT1G77120/AT5G58070/AT4G39090/AT2G37040/AT2G38750/AT1G35720/AT4G25490/AT2G21620/AT5G23010/AT1G56600/AT5G58670/AT4G26070/AT3G19600/AT3G50970/AT5G61590/AT5G26340/AT2G37170/AT4G17870/AT5G25370/AT5G65730/AT3G56400/AT4G02380/AT4G27410/AT1G52890/AT3G15500/AT2G05520/AT3G30775/AT1G07240/AT5G66880/AT1G04400/AT3G61430	33
60	mus81_down	GO:0000904	cell morphogenesis involved in differentiation	24/1013	255/21845	0.000834295	0.0381322	0.036678	AT5G52360/AT1G50610/AT1G10770/AT2G32460/AT3G01700/AT2G31500/AT5G28680/AT4G39110/AT5G12180/AT1G48020/AT1G68360/AT2G07040/AT1G03050/AT5G65530/AT2G33775/AT1G79860/AT4G33970/AT4G13240/AT3G42880/AT2G47040/AT1G28270/AT5G14380/AT3G20190/AT5G16490	24
61	msh4_down	GO:0010208	pollen wall assembly	19/2288	43/21845	1.5e-08	2.63e-05	2.62e-05	AT4G14080/AT3G55090/AT1G02050/AT4G20050/AT1G01280/AT2G19070/AT4G34850/AT4G35420/AT3G11980/AT1G68540/AT5G22260/AT1G62940/AT3G59530/AT1G69500/AT5G15480/AT3G13220/AT2G42940/AT3G23860/AT1G65060	19
62	msh4_down	GO:0010927	cellular component assembly involved in morphogenesis	19/2288	45/21845	3.71e-08	2.63e-05	2.62e-05	AT4G14080/AT3G55090/AT1G02050/AT4G20050/AT1G01280/AT2G19070/AT4G34850/AT4G35420/AT3G11980/AT1G68540/AT5G22260/AT1G62940/AT3G59530/AT1G69500/AT5G15480/AT3G13220/AT2G42940/AT3G23860/AT1G65060	19
63	msh4_down	GO:0032436	positive regulation of proteasomal ubiquitin-dependent protein catabolic process	20/2288	51/21845	7.26e-08	2.63e-05	2.62e-05	AT3G27710/AT5G27080/AT3G45540/AT5G27945/AT5G27570/AT5G26900/AT3G45480/AT2G31770/AT3G45555/AT5G08730/AT3G45580/AT3G45500/AT5G63750/AT2G31780/AT3G45560/AT5G63730/AT3G43750/AT2G31760/AT2G19610/AT3G45460	20
64	msh4_down	GO:2000058	regulation of ubiquitin-dependent protein catabolic process	21/2288	56/21845	8.6e-08	2.63e-05	2.62e-05	AT3G27710/AT5G27080/AT3G45540/AT2G12550/AT5G27945/AT5G27570/AT5G26900/AT3G45480/AT2G31770/AT3G45555/AT5G08730/AT3G45580/AT3G45500/AT5G63750/AT2G31780/AT3G45560/AT5G63730/AT3G43750/AT2G31760/AT2G19610/AT3G45460	21
65	msh4_down	GO:0032989	cellular component morphogenesis	19/2288	47/21845	8.64e-08	2.63e-05	2.62e-05	AT4G14080/AT3G55090/AT1G02050/AT4G20050/AT1G01280/AT2G19070/AT4G34850/AT4G35420/AT3G11980/AT1G68540/AT5G22260/AT1G62940/AT3G59530/AT1G69500/AT5G15480/AT3G13220/AT2G42940/AT3G23860/AT1G65060	19
66	msh4_down	GO:1901800	positive regulation of proteasomal protein catabolic process	20/2288	52/21845	1.06e-07	2.63e-05	2.62e-05	AT3G27710/AT5G27080/AT3G45540/AT5G27945/AT5G27570/AT5G26900/AT3G45480/AT2G31770/AT3G45555/AT5G08730/AT3G45580/AT3G45500/AT5G63750/AT2G31780/AT3G45560/AT5G63730/AT3G43750/AT2G31760/AT2G19610/AT3G45460	20
67	msh4_down	GO:2000060	positive regulation of ubiquitin-dependent protein catabolic process	20/2288	52/21845	1.06e-07	2.63e-05	2.62e-05	AT3G27710/AT5G27080/AT3G45540/AT5G27945/AT5G27570/AT5G26900/AT3G45480/AT2G31770/AT3G45555/AT5G08730/AT3G45580/AT3G45500/AT5G63750/AT2G31780/AT3G45560/AT5G63730/AT3G43750/AT2G31760/AT2G19610/AT3G45460	20
68	msh4_down	GO:0010584	pollen exine formation	15/2288	31/21845	1.12e-07	2.63e-05	2.62e-05	AT4G14080/AT1G02050/AT4G20050/AT1G01280/AT2G19070/AT4G34850/AT4G35420/AT3G11980/AT1G68540/AT1G62940/AT3G59530/AT1G69500/AT3G13220/AT3G23860/AT1G65060	15
69	msh4_down	GO:0032434	regulation of proteasomal ubiquitin-dependent protein catabolic process	20/2288	54/21845	2.21e-07	3.77e-05	3.75e-05	AT3G27710/AT5G27080/AT3G45540/AT5G27945/AT5G27570/AT5G26900/AT3G45480/AT2G31770/AT3G45555/AT5G08730/AT3G45580/AT3G45500/AT5G63750/AT2G31780/AT3G45560/AT5G63730/AT3G43750/AT2G31760/AT2G19610/AT3G45460	20
70	msh4_down	GO:1903052	positive regulation of proteolysis involved in cellular protein catabolic process	20/2288	54/21845	2.21e-07	3.77e-05	3.75e-05	AT3G27710/AT5G27080/AT3G45540/AT5G27945/AT5G27570/AT5G26900/AT3G45480/AT2G31770/AT3G45555/AT5G08730/AT3G45580/AT3G45500/AT5G63750/AT2G31780/AT3G45560/AT5G63730/AT3G43750/AT2G31760/AT2G19610/AT3G45460	20
71	msh4_down	GO:1903364	positive regulation of cellular protein catabolic process	20/2288	54/21845	2.21e-07	3.77e-05	3.75e-05	AT3G27710/AT5G27080/AT3G45540/AT5G27945/AT5G27570/AT5G26900/AT3G45480/AT2G31770/AT3G45555/AT5G08730/AT3G45580/AT3G45500/AT5G63750/AT2G31780/AT3G45560/AT5G63730/AT3G43750/AT2G31760/AT2G19610/AT3G45460	20
72	msh4_down	GO:0045862	positive regulation of proteolysis	20/2288	56/21845	4.39e-07	6.21e-05	6.18e-05	AT3G27710/AT5G27080/AT3G45540/AT5G27945/AT5G27570/AT5G26900/AT3G45480/AT2G31770/AT3G45555/AT5G08730/AT3G45580/AT3G45500/AT5G63750/AT2G31780/AT3G45560/AT5G63730/AT3G43750/AT2G31760/AT2G19610/AT3G45460	20
73	msh4_down	GO:1903050	regulation of proteolysis involved in cellular protein catabolic process	21/2288	61/21845	4.63e-07	6.21e-05	6.18e-05	AT3G27710/AT5G27080/AT3G45540/AT2G12550/AT5G27945/AT5G27570/AT5G26900/AT3G45480/AT2G31770/AT3G45555/AT5G08730/AT3G45580/AT3G45500/AT5G63750/AT2G31780/AT3G45560/AT5G63730/AT3G43750/AT2G31760/AT2G19610/AT3G45460	21
74	msh4_down	GO:1903362	regulation of cellular protein catabolic process	21/2288	61/21845	4.63e-07	6.21e-05	6.18e-05	AT3G27710/AT5G27080/AT3G45540/AT2G12550/AT5G27945/AT5G27570/AT5G26900/AT3G45480/AT2G31770/AT3G45555/AT5G08730/AT3G45580/AT3G45500/AT5G63750/AT2G31780/AT3G45560/AT5G63730/AT3G43750/AT2G31760/AT2G19610/AT3G45460	21
75	msh4_down	GO:0061136	regulation of proteasomal protein catabolic process	20/2288	58/21845	8.4e-07	0.000105168	0.000104631	AT3G27710/AT5G27080/AT3G45540/AT5G27945/AT5G27570/AT5G26900/AT3G45480/AT2G31770/AT3G45555/AT5G08730/AT3G45580/AT3G45500/AT5G63750/AT2G31780/AT3G45560/AT5G63730/AT3G43750/AT2G31760/AT2G19610/AT3G45460	20
76	msh4_down	GO:0030162	regulation of proteolysis	24/2288	80/21845	1.28e-06	0.000149808	0.000149044	AT3G27710/AT5G27080/AT3G45540/AT2G12550/AT5G27945/AT5G27570/AT5G26900/AT3G45480/AT2G31770/AT3G45555/AT5G08730/AT3G45580/AT3G45500/AT5G63750/AT2G31780/AT1G11980/AT1G62160/AT3G45560/AT5G63730/AT3G43750/AT2G31760/AT1G62170/AT2G19610/AT3G45460	24
77	msh4_down	GO:0045732	positive regulation of protein catabolic process	20/2288	60/21845	1.55e-06	0.000171327	0.000170453	AT3G27710/AT5G27080/AT3G45540/AT5G27945/AT5G27570/AT5G26900/AT3G45480/AT2G31770/AT3G45555/AT5G08730/AT3G45580/AT3G45500/AT5G63750/AT2G31780/AT3G45560/AT5G63730/AT3G43750/AT2G31760/AT2G19610/AT3G45460	20
78	msh4_down	GO:0045490	pectin catabolic process	25/2288	96/21845	1.28e-05	0.00133426	0.00132746	AT4G02320/AT1G53830/AT2G19150/AT5G15110/AT5G27870/AT3G43270/AT4G22090/AT4G02300/AT5G07430/AT5G55590/AT3G07970/AT5G55720/AT1G11920/AT3G17060/AT5G20860/AT4G22080/AT3G59010/AT5G49180/AT2G26450/AT2G47280/AT1G23200/AT2G47040/AT3G01270/AT4G33230/AT2G47030	25
79	msh4_down	GO:0042176	regulation of protein catabolic process	21/2288	75/21845	1.89e-05	0.0018656	0.00185609	AT3G27710/AT5G27080/AT3G45540/AT2G12550/AT5G27945/AT5G27570/AT5G26900/AT3G45480/AT2G31770/AT3G45555/AT5G08730/AT3G45580/AT3G45500/AT5G63750/AT2G31780/AT3G45560/AT5G63730/AT3G43750/AT2G31760/AT2G19610/AT3G45460	21
80	msh4_down	GO:0070940	dephosphorylation of RNA polymerase II C-terminal domain	8/2288	15/21845	4.67e-05	0.00438896	0.00436657	AT2G04930/AT3G19595/AT3G19600/AT1G43610/AT3G17550/AT5G23470/AT1G20320/AT2G02290	8
81	msh4_down	GO:0032270	positive regulation of cellular protein metabolic process	37/2288	181/21845	5.18e-05	0.00463188	0.00460826	AT3G27710/AT5G27080/AT3G45540/AT2G34290/AT5G27945/AT3G46140/AT5G27570/AT5G26900/AT4G14480/AT3G45480/AT2G31770/AT5G57380/AT2G40560/AT3G50310/AT1G07150/AT3G46160/AT3G45790/AT3G45555/AT2G42550/AT5G08730/AT2G39790/AT3G45580/AT3G45500/AT5G27510/AT2G40500/AT5G63750/AT2G31780/AT2G41920/AT1G32320/AT2G32510/AT3G45560/AT5G63730/AT3G43750/AT2G31760/AT2G19610/AT2G42940/AT3G45460	37
82	msh4_down	GO:0051247	positive regulation of protein metabolic process	37/2288	189/21845	0.000133091	0.0105728	0.0105189	AT3G27710/AT5G27080/AT3G45540/AT2G34290/AT5G27945/AT3G46140/AT5G27570/AT5G26900/AT4G14480/AT3G45480/AT2G31770/AT5G57380/AT2G40560/AT3G50310/AT1G07150/AT3G46160/AT3G45790/AT3G45555/AT2G42550/AT5G08730/AT2G39790/AT3G45580/AT3G45500/AT5G27510/AT2G40500/AT5G63750/AT2G31780/AT2G41920/AT1G32320/AT2G32510/AT3G45560/AT5G63730/AT3G43750/AT2G31760/AT2G19610/AT2G42940/AT3G45460	37
83	msh4_down	GO:0048868	pollen tube development	41/2288	217/21845	0.000135152	0.0105728	0.0105189	AT3G05770/AT2G21480/AT4G28650/AT5G52360/AT1G77980/AT4G29470/AT1G63530/AT2G25600/AT1G79250/AT3G12160/AT2G32460/AT3G51300/AT3G01700/AT2G31500/AT5G28680/AT4G39110/AT2G07040/AT3G13900/AT1G04880/AT5G45840/AT1G61290/AT1G19780/AT2G35070/AT5G16500/AT1G03050/AT1G49490/AT3G03650/AT5G01180/AT4G34940/AT2G31910/AT2G33775/AT3G02810/AT4G02650/AT5G20690/AT4G13240/AT1G27380/AT2G47040/AT3G27960/AT1G04450/AT1G05580…	41
84	msh4_down	GO:0031331	positive regulation of cellular catabolic process	20/2288	79/21845	0.000139301	0.0105728	0.0105189	AT3G27710/AT5G27080/AT3G45540/AT5G27945/AT5G27570/AT5G26900/AT3G45480/AT2G31770/AT3G45555/AT5G08730/AT3G45580/AT3G45500/AT5G63750/AT2G31780/AT3G45560/AT5G63730/AT3G43750/AT2G31760/AT2G19610/AT3G45460	20
85	msh4_down	GO:0048235	pollen sperm cell differentiation	12/2288	35/21845	0.000140746	0.0105728	0.0105189	AT5G52000/AT2G32460/AT3G60460/AT3G50310/AT3G07970/AT5G02390/AT3G62230/AT1G24520/AT4G28395/AT2G17180/AT5G53520/AT3G04620	12
86	msh4_down	GO:0042737	drug catabolic process	34/2288	175/21845	0.000282722	0.0204212	0.0203171	AT4G02320/AT5G14780/AT1G53830/AT2G19150/AT5G15110/AT3G10340/AT5G27870/AT3G43270/AT4G22090/AT4G02300/AT5G07430/AT1G65990/AT5G55590/AT3G07970/AT5G55720/AT1G60740/AT1G11920/AT3G17060/AT5G20860/AT2G02380/AT4G22080/AT3G59010/AT4G35970/AT3G09640/AT5G49180/AT2G26450/AT2G47280/AT1G23200/AT5G18860/AT2G47040/AT3G01270/AT5G13700/AT4G33230/AT2G47030	34
87	msh4_down	GO:0009896	positive regulation of catabolic process	20/2288	85/21845	0.00039947	0.0277854	0.0276436	AT3G27710/AT5G27080/AT3G45540/AT5G27945/AT5G27570/AT5G26900/AT3G45480/AT2G31770/AT3G45555/AT5G08730/AT3G45580/AT3G45500/AT5G63750/AT2G31780/AT3G45560/AT5G63730/AT3G43750/AT2G31760/AT2G19610/AT3G45460	20
88	msh4_down	GO:0009860	pollen tube growth	31/2288	160/21845	0.000538134	0.0348553	0.0346775	AT2G21480/AT5G52360/AT1G77980/AT4G29470/AT1G63530/AT2G25600/AT1G79250/AT3G12160/AT2G32460/AT3G51300/AT3G01700/AT2G31500/AT5G28680/AT4G39110/AT2G07040/AT3G13900/AT1G04880/AT1G61290/AT1G19780/AT1G03050/AT1G49490/AT5G01180/AT4G34940/AT2G33775/AT4G02650/AT4G13240/AT1G27380/AT2G47040/AT3G27960/AT1G04450/AT3G23860	31
89	msh4_down	GO:0006511	ubiquitin-dependent protein catabolic process	75/2288	491/21845	0.000538235	0.0348553	0.0346775	AT3G27710/AT4G05310/AT5G27080/AT2G03170/AT5G16090/AT3G45540/AT5G41430/AT1G57730/AT2G12550/AT5G27945/AT5G27570/AT3G60010/AT5G26900/AT4G12100/AT3G45480/AT2G34940/AT1G51320/AT4G02970/AT2G31770/AT5G03920/AT2G16810/AT4G05270/AT5G37230/AT1G48530/AT4G03630/AT4G12820/AT4G03370/AT3G23950/AT3G45555/AT3G08700/AT5G53840/AT1G20140/AT1G32850/AT1G80570/AT5G08730/AT3G45580/AT4G18110/AT4G34210/AT5G21900/AT2G03560…	75
90	msh4_down	GO:0031098	stress-activated protein kinase signaling cascade	14/2288	52/21845	0.00069628	0.0435412	0.0433191	AT2G34290/AT3G46140/AT4G14480/AT2G40560/AT3G50310/AT1G07150/AT3G46160/AT3G45790/AT2G42550/AT5G27510/AT2G40500/AT2G41920/AT1G32320/AT2G32510	14
91	msh4_down	GO:0000272	polysaccharide catabolic process	27/2288	135/21845	0.000718732	0.0435412	0.0433191	AT4G02320/AT1G53830/AT2G19150/AT5G15110/AT5G27870/AT3G43270/AT4G22090/AT4G02300/AT5G49360/AT5G07430/AT5G55590/AT3G07970/AT5G55720/AT1G11920/AT3G17060/AT5G20860/AT4G22080/AT3G59010/AT5G49180/AT2G26450/AT2G47280/AT1G23200/AT2G47040/AT2G40220/AT3G01270/AT4G33230/AT2G47030	27

## Sheet: dw_GO_MF
Supplementary Data 1 Enriched GO terms from up- and down-regulated DEGs in WT, mus81 and msh4 after heat stress.
	Cluster	ID	Description	GeneRatio	BgRatio	pvalue	p.adjust	qvalue	geneID	Count
1	Col_down	GO:0080031	methyl salicylate esterase activity	8/1256	19/21293	6.03225e-06	0.00177951	0.00167316	AT2G23590/AT2G23560/AT2G23600/AT4G16690/AT5G58310/AT2G23550/AT2G23610/AT1G26360	8
2	Col_down	GO:0080032	methyl jasmonate esterase activity	8/1256	19/21293	6.03225e-06	0.00177951	0.00167316	AT2G23590/AT2G23560/AT2G23600/AT4G16690/AT5G58310/AT2G23550/AT2G23610/AT1G26360	8
3	Col_down	GO:0080030	methyl indole-3-acetate esterase activity	9/1256	36/21293	0.000185516	0.0364849	0.0343043	AT1G68620/AT2G23590/AT2G23560/AT2G23600/AT4G16690/AT5G58310/AT2G23550/AT2G23610/AT1G26360	9
4	Col_down	GO:0052689	carboxylic ester hydrolase activity	28/1256	234/21293	0.000298386	0.044012	0.0413815	AT5G16120/AT2G19150/AT3G36659/AT1G70540/AT3G09410/AT3G43270/AT3G47400/AT1G11370/AT3G12880/AT5G14180/AT1G68620/AT2G23590/AT5G55590/AT2G23560/AT2G23600/AT3G09405/AT4G16690/AT3G24130/AT1G13700/AT5G49180/AT1G23200/AT5G58310/AT3G47380/AT2G23550/AT2G23610/AT1G26360/AT1G73480/AT3G49330	28
5	mus81_down	GO:0030599	pectinesterase activity	18/1019	105/21293	2.31852e-06	0.00114565	0.00109252	AT5G07410/AT2G19150/AT4G02250/AT1G10770/AT5G61680/AT5G27870/AT3G43270/AT3G05610/AT1G48020/AT2G31430/AT5G07430/AT3G17060/AT3G62170/AT2G26450/AT2G47040/AT4G15980/AT4G33230/AT2G47030	18
6	mus81_down	GO:0004857	enzyme inhibitor activity	26/1019	202/21293	4.39787e-06	0.00114565	0.00109252	AT4G02250/AT2G32710/AT1G10770/AT5G27870/AT2G47050/AT3G43270/AT3G05610/AT1G48020/AT2G31430/AT4G01026/AT1G23350/AT2G43520/AT5G50040/AT4G17870/AT5G06860/AT3G62170/AT1G14890/AT3G62180/AT2G26450/AT2G47040/AT4G24640/AT4G15980/AT1G62170/AT4G33230/AT2G47030/AT5G06870	26
7	mus81_down	GO:0015295	solute:proton symporter activity	17/1019	105/21293	9.74057e-06	0.00169161	0.00161318	AT1G22710/AT2G43330/AT1G72125/AT3G05150/AT4G36670/AT1G08900/AT3G19930/AT5G23270/AT1G54730/AT3G05160/AT5G26340/AT1G07340/AT2G37900/AT1G11260/AT4G16480/AT1G72140/AT2G03590	17
8	mus81_down	GO:0052689	carboxylic ester hydrolase activity	27/1019	234/21293	2.21432e-05	0.00242974	0.00231707	AT5G16120/AT5G07410/AT4G30140/AT2G19150/AT4G02250/AT1G10770/AT5G61680/AT5G27870/AT3G43270/AT3G05610/AT4G19410/AT1G48020/AT2G31430/AT5G07430/AT2G23600/AT3G09405/AT4G16690/AT3G17060/AT3G62170/AT1G13700/AT4G22305/AT2G26450/AT2G47040/AT4G15980/AT2G23610/AT4G33230/AT2G47030	27
9	mus81_down	GO:0015294	solute:cation symporter activity	17/1019	112/21293	2.3318e-05	0.00242974	0.00231707	AT1G22710/AT2G43330/AT1G72125/AT3G05150/AT4G36670/AT1G08900/AT3G19930/AT5G23270/AT1G54730/AT3G05160/AT5G26340/AT1G07340/AT2G37900/AT1G11260/AT4G16480/AT1G72140/AT2G03590	17
10	mus81_down	GO:0015293	symporter activity	17/1019	114/21293	2.9488e-05	0.00256054	0.00244181	AT1G22710/AT2G43330/AT1G72125/AT3G05150/AT4G36670/AT1G08900/AT3G19930/AT5G23270/AT1G54730/AT3G05160/AT5G26340/AT1G07340/AT2G37900/AT1G11260/AT4G16480/AT1G72140/AT2G03590	17
11	mus81_down	GO:0005351	carbohydrate:proton symporter activity	11/1019	54/21293	4.11518e-05	0.00268001	0.00255574	AT1G22710/AT3G05150/AT4G36670/AT1G08900/AT3G19930/AT5G23270/AT1G54730/AT3G05160/AT5G26340/AT1G07340/AT1G11260	11
12	mus81_down	GO:0005402	carbohydrate:cation symporter activity	11/1019	54/21293	4.11518e-05	0.00268001	0.00255574	AT1G22710/AT3G05150/AT4G36670/AT1G08900/AT3G19930/AT5G23270/AT1G54730/AT3G05160/AT5G26340/AT1G07340/AT1G11260	11
13	mus81_down	GO:0008889	glycerophosphodiester phosphodiesterase activity	5/1019	12/21293	0.000148475	0.00859503	0.00819649	AT5G43300/AT1G66970/AT5G41080/AT5G58170/AT5G58050	5
14	mus81_down	GO:0046910	pectinesterase inhibitor activity	13/1019	84/21293	0.000170143	0.00886447	0.00845344	AT4G02250/AT1G10770/AT5G27870/AT3G43270/AT3G05610/AT1G48020/AT2G31430/AT3G62170/AT2G26450/AT2G47040/AT4G15980/AT4G33230/AT2G47030	13
15	mus81_down	GO:0015144	carbohydrate transmembrane transporter activity	14/1019	100/21293	0.00028704	0.0135953	0.0129649	AT1G22710/AT2G43330/AT3G05150/AT1G16390/AT4G36670/AT1G08900/AT3G19930/AT5G23270/AT1G54730/AT3G05160/AT5G26340/AT1G07340/AT1G11260/AT4G16480	14
16	mus81_down	GO:0004553	hydrolase activity, hydrolyzing O-glycosyl compounds	32/1019	359/21293	0.000570117	0.0247526	0.0236048	AT4G18340/AT1G02790/AT5G20390/AT5G48140/AT2G23900/AT3G14040/AT3G07850/AT5G18670/AT3G62740/AT1G45191/AT3G52600/AT1G61820/AT3G57520/AT2G16730/AT1G67830/AT4G35010/AT5G65730/AT1G61810/AT3G52840/AT3G06500/AT1G12240/AT1G33700/AT3G07820/AT5G47000/AT3G47010/AT4G24040/AT3G62710/AT3G43860/AT2G44480/AT4G10060/AT2G44560/AT1G60270	32
17	mus81_down	GO:0016837	carbon-oxygen lyase activity, acting on polysaccharides	6/1019	24/21293	0.000757715	0.0281978	0.0268903	AT1G14420/AT5G15110/AT4G22090/AT5G55720/AT3G01270/AT2G02720	6
18	mus81_down	GO:0030570	pectate lyase activity	6/1019	24/21293	0.000757715	0.0281978	0.0268903	AT1G14420/AT5G15110/AT4G22090/AT5G55720/AT3G01270/AT2G02720	6
19	mus81_down	GO:0030234	enzyme regulator activity	36/1019	431/21293	0.000888442	0.0308586	0.0294277	AT4G02250/AT2G32710/AT1G10770/AT5G27870/AT2G47050/AT3G43270/AT3G05610/AT1G48020/AT5G21170/AT2G31430/AT4G01026/AT1G23350/AT2G43520/AT3G48530/AT5G50040/AT4G17870/AT2G31810/AT5G06860/AT3G62170/AT1G14890/AT1G73500/AT3G16410/AT3G62180/AT2G26450/AT3G53800/AT2G47040/AT4G24640/AT4G15980/AT1G62170/AT5G67260/AT4G29950/AT4G33230/AT2G47030/AT5G02110/AT5G06870/AT3G16400	36
20	mus81_down	GO:0022853	active ion transmembrane transporter activity	27/1019	299/21293	0.0012249	0.0398857	0.0380363	AT1G22710/AT5G13750/AT2G43330/AT5G17850/AT1G72125/AT3G21180/AT3G05150/AT1G16310/AT1G08150/AT3G42640/AT4G36670/AT1G08900/AT3G27870/AT3G19930/AT5G23270/AT1G54730/AT3G05160/AT1G23090/AT1G08140/AT5G26340/AT1G07340/AT2G37900/AT1G11260/AT4G16480/AT1G05580/AT1G72140/AT2G03590	27
21	mus81_down	GO:0098772	molecular function regulator	39/1019	489/21293	0.00131977	0.040447	0.0385716	AT2G43535/AT4G02250/AT2G32710/AT1G10770/AT5G27870/AT2G47050/AT3G43270/AT3G05610/AT1G48020/AT5G21170/AT2G31430/AT4G01026/AT1G23350/AT2G43520/AT3G48530/AT5G50040/AT4G17870/AT2G31810/AT5G06860/AT3G62170/AT1G14890/AT1G73500/AT3G16410/AT3G62180/AT2G26450/AT1G79860/AT4G13240/AT3G53800/AT2G47040/AT4G24640/AT4G15980/AT1G62170/AT5G67260/AT4G29950/AT4G33230/AT2G47030/AT5G02110/AT5G06870/AT3G16400	39
22	mus81_down	GO:0015291	secondary active transmembrane transporter activity	29/1019	336/21293	0.00165366	0.0478643	0.0456449	AT1G22710/AT5G13750/AT2G43330/AT5G17850/AT1G72125/AT3G05150/AT1G16310/AT1G08150/AT1G66760/AT1G15180/AT4G36670/AT1G08900/AT3G19930/AT2G04080/AT5G23270/AT1G54730/AT3G05160/AT1G23090/AT1G08140/AT4G36820/AT5G26340/AT1G07340/AT2G37900/AT1G47530/AT1G11260/AT4G16480/AT1G05580/AT1G72140/AT2G03590	29
23	msh4_down	GO:0031624	ubiquitin conjugating enzyme binding	17/2286	46/21293	2.59263e-06	0.00180188	0.00170022	AT3G27710/AT3G45540/AT5G52150/AT3G45480/AT2G31770/AT3G45555/AT5G08730/AT3G45580/AT3G45500/AT5G63750/AT2G31780/AT3G45560/AT5G63730/AT3G43750/AT2G31760/AT2G19610/AT3G45460	17
24	msh4_down	GO:0061630	ubiquitin protein ligase activity	47/2286	229/21293	9.34933e-06	0.00244328	0.00230543	AT3G27710/AT5G27080/AT3G45540/AT1G53190/AT5G41430/AT1G57730/AT5G27945/AT5G27570/AT5G26900/AT5G18340/AT5G41440/AT3G45480/AT2G34940/AT1G36950/AT2G31770/AT5G37230/AT3G45555/AT5G08730/AT1G18780/AT3G45580/AT4G18110/AT3G45500/AT5G22920/AT5G63750/AT3G43430/AT5G37870/AT2G31780/AT2G41980/AT5G24870/AT4G00070/AT4G20110/AT1G21960/AT3G45560/AT1G22670/AT1G60360/AT5G37270/AT5G63730/AT3G43750/AT2G31760/AT1G35625…	47
25	msh4_down	GO:0061659	ubiquitin-like protein ligase activity	47/2286	230/21293	1.05465e-05	0.00244328	0.00230543	AT3G27710/AT5G27080/AT3G45540/AT1G53190/AT5G41430/AT1G57730/AT5G27945/AT5G27570/AT5G26900/AT5G18340/AT5G41440/AT3G45480/AT2G34940/AT1G36950/AT2G31770/AT5G37230/AT3G45555/AT5G08730/AT1G18780/AT3G45580/AT4G18110/AT3G45500/AT5G22920/AT5G63750/AT3G43430/AT5G37870/AT2G31780/AT2G41980/AT5G24870/AT4G00070/AT4G20110/AT1G21960/AT3G45560/AT1G22670/AT1G60360/AT5G37270/AT5G63730/AT3G43750/AT2G31760/AT1G35625…	47
26	msh4_down	GO:0004842	ubiquitin-protein transferase activity	76/2286	446/21293	3.14734e-05	0.0054685	0.00515998	AT3G27710/AT5G27080/AT3G45540/AT1G53190/AT5G41430/AT1G57730/AT5G27945/AT1G01680/AT1G02980/AT5G27570/AT5G26900/AT5G05280/AT5G52150/AT5G18340/AT5G41440/AT3G45480/AT2G34940/AT1G43140/AT1G36950/AT2G31770/AT5G18330/AT5G37230/AT4G23450/AT3G23950/AT3G45555/AT3G08700/AT1G53025/AT1G53023/AT5G65500/AT5G08730/AT1G18780/AT3G45580/AT4G18110/AT5G64660/AT3G45500/AT5G22920/AT1G59790/AT5G63750/AT3G28330/AT3G43430…	76
27	msh4_down	GO:0044390	ubiquitin-like protein conjugating enzyme binding	17/2286	55/21293	3.93816e-05	0.00547404	0.00516521	AT3G27710/AT3G45540/AT5G52150/AT3G45480/AT2G31770/AT3G45555/AT5G08730/AT3G45580/AT3G45500/AT5G63750/AT2G31780/AT3G45560/AT5G63730/AT3G43750/AT2G31760/AT2G19610/AT3G45460	17
28	msh4_down	GO:0019787	ubiquitin-like protein transferase activity	76/2286	454/21293	5.78559e-05	0.00547615	0.0051672	AT3G27710/AT5G27080/AT3G45540/AT1G53190/AT5G41430/AT1G57730/AT5G27945/AT1G01680/AT1G02980/AT5G27570/AT5G26900/AT5G05280/AT5G52150/AT5G18340/AT5G41440/AT3G45480/AT2G34940/AT1G43140/AT1G36950/AT2G31770/AT5G18330/AT5G37230/AT4G23450/AT3G23950/AT3G45555/AT3G08700/AT1G53025/AT1G53023/AT5G65500/AT5G08730/AT1G18780/AT3G45580/AT4G18110/AT5G64660/AT3G45500/AT5G22920/AT1G59790/AT5G63750/AT3G28330/AT3G43430…	76
29	msh4_down	GO:0080031	methyl salicylate esterase activity	9/2286	19/21293	6.30348e-05	0.00547615	0.0051672	AT1G69240/AT2G23590/AT2G23560/AT2G23600/AT4G37150/AT4G16690/AT5G58310/AT2G23550/AT1G26360	9
30	msh4_down	GO:0080032	methyl jasmonate esterase activity	9/2286	19/21293	6.30348e-05	0.00547615	0.0051672	AT1G69240/AT2G23590/AT2G23560/AT2G23600/AT4G37150/AT4G16690/AT5G58310/AT2G23550/AT1G26360	9
31	msh4_down	GO:0008420	RNA polymerase II CTD heptapeptide repeat phosphatase activity	8/2286	18/21293	0.000282883	0.0196604	0.0185512	AT2G04930/AT3G19595/AT3G19600/AT1G43610/AT3G17550/AT5G23470/AT1G20320/AT2G02290	8
32	msh4_down	GO:0070628	proteasome binding	8/2286	18/21293	0.000282883	0.0196604	0.0185512	AT4G05310/AT5G16090/AT4G02970/AT4G05270/AT4G03370/AT4G05250/AT4G03350/AT4G05230	8
33	msh4_down	GO:0000156	phosphorelay response regulator activity	11/2286	33/21293	0.000436479	0.0256439	0.0241971	AT2G47430/AT3G48100/AT1G59940/AT2G40670/AT1G68210/AT5G49240/AT2G27070/AT1G49190/AT3G56380/AT1G67710/AT5G62920	11
34	msh4_down	GO:0015179	L-amino acid transmembrane transporter activity	8/2286	19/21293	0.000442773	0.0256439	0.0241971	AT3G01760/AT4G21120/AT1G79900/AT2G40900/AT4G01430/AT1G01070/AT1G44800/AT2G39510	8
35	msh4_down	GO:0003714	transcription corepressor activity	12/2286	41/21293	0.0009161	0.0489761	0.046213	AT1G24230/AT1G27240/AT1G23810/AT1G27260/AT1G55050/AT1G24220/AT1G27250/AT2G47820/AT1G24250/AT1G70030/AT1G24200/AT1G27270	12

## Sheet: dw_GO_CC
Supplementary Data 1 Enriched GO terms from up- and down-regulated DEGs in WT, mus81 and msh4 after heat stress.
	Cluster	ID	Description	GeneRatio	BgRatio	pvalue	p.adjust	qvalue	geneID	Count
1	mus81_down	GO:0090406	pollen tube	19/1145	81/25408	2.42e-09	4.44e-07	4.29e-07	AT5G07410/AT4G30140/AT3G06260/AT2G32460/AT5G28680/AT1G48020/AT2G07040/AT5G23270/AT4G18640/AT5G16500/AT1G03050/AT3G62170/AT2G33775/AT1G79860/AT3G02810/AT5G20690/AT2G47040/AT2G47030/AT3G09530	19
2	mus81_down	GO:0120025	plasma membrane bounded cell projection	19/1145	96/25408	4.73e-08	4.33e-06	4.19e-06	AT5G07410/AT4G30140/AT3G06260/AT2G32460/AT5G28680/AT1G48020/AT2G07040/AT5G23270/AT4G18640/AT5G16500/AT1G03050/AT3G62170/AT2G33775/AT1G79860/AT3G02810/AT5G20690/AT2G47040/AT2G47030/AT3G09530	19
3	mus81_down	GO:0098590	plasma membrane region	23/1145	142/25408	9.73e-08	5.93e-06	5.73e-06	AT5G07410/AT4G30140/AT3G06260/AT2G32460/AT1G68110/AT5G28680/AT4G39110/AT1G48020/AT2G07040/AT5G23270/AT4G18640/AT5G16500/AT1G03050/AT3G62170/AT2G33775/AT1G25240/AT1G79860/AT3G02810/AT5G20690/AT2G47040/AT2G47030/AT5G16490/AT3G09530	23
4	mus81_down	GO:0042995	cell projection	20/1145	113/25408	1.48e-07	6.79e-06	6.56e-06	AT5G07410/AT4G30140/AT3G06260/AT2G32460/AT5G28680/AT1G48020/AT2G07040/AT5G39400/AT5G23270/AT4G18640/AT5G16500/AT1G03050/AT3G62170/AT2G33775/AT1G79860/AT3G02810/AT5G20690/AT2G47040/AT2G47030/AT3G09530	20
5	mus81_down	GO:0035838	growing cell tip	6/1145	18/25408	9.61e-05	0.00293245	0.00283377	AT5G28680/AT1G48020/AT5G16500/AT1G03050/AT3G02810/AT5G20690	6
6	mus81_down	GO:0090404	pollen tube tip	6/1145	18/25408	9.61e-05	0.00293245	0.00283377	AT5G28680/AT1G48020/AT5G16500/AT1G03050/AT3G02810/AT5G20690	6
7	mus81_down	GO:0030427	site of polarized growth	6/1145	20/25408	0.00018577	0.00485643	0.00469301	AT5G28680/AT1G48020/AT5G16500/AT1G03050/AT3G02810/AT5G20690	6
8	mus81_down	GO:0051286	cell tip	6/1145	22/25408	0.00033096	0.00757074	0.00731599	AT5G28680/AT1G48020/AT5G16500/AT1G03050/AT3G02810/AT5G20690	6
9	msh4_down	GO:0090406	pollen tube	23/2591	81/25408	3.82e-06	0.00113099	0.00113099	AT4G28650/AT5G44610/AT3G12160/AT3G06260/AT2G32460/AT5G28680/AT2G07040/AT1G30220/AT1G04880/AT5G45840/AT5G23270/AT5G16500/AT1G03050/AT1G51800/AT4G34940/AT4G02050/AT2G33775/AT3G02810/AT4G02650/AT5G20690/AT2G47040/AT2G47030/AT3G09530	23
10	msh4_down	GO:0120025	plasma membrane bounded cell projection	24/2591	96/25408	2.55e-05	0.00337138	0.00337138	AT4G28650/AT5G44610/AT3G12160/AT3G06260/AT2G32460/AT5G28680/AT2G07040/AT1G30220/AT1G04880/AT5G45840/AT5G23270/AT5G16500/AT1G03050/AT1G51800/AT4G34940/AT4G02050/AT2G33775/AT3G43230/AT3G02810/AT4G02650/AT5G20690/AT2G47040/AT2G47030/AT3G09530	24
11	msh4_down	GO:0098590	plasma membrane region	31/2591	142/25408	3.42e-05	0.00337138	0.00337138	AT2G21480/AT4G28650/AT5G44610/AT3G12160/AT1G05020/AT3G06260/AT2G32460/AT5G28680/AT4G39110/AT5G25250/AT2G07040/AT1G30220/AT1G04880/AT5G45840/AT5G23270/AT5G16500/AT1G03050/AT5G64870/AT1G51800/AT4G34940/AT4G02050/AT2G33775/AT1G25240/AT3G43230/AT3G02810/AT4G02650/AT5G20690/AT2G47040/AT2G47030/AT4G25940/AT3G09530	31
12	msh4_down	GO:0042995	cell projection	26/2591	113/25408	5.61e-05	0.0041493	0.0041493	AT4G28650/AT5G44610/AT3G12160/AT3G06260/AT2G32460/AT3G51300/AT5G28680/AT2G07040/AT1G30220/AT1G04880/AT5G45840/AT5G39400/AT5G23270/AT5G16500/AT1G03050/AT1G51800/AT4G34940/AT4G02050/AT2G33775/AT3G43230/AT3G02810/AT4G02650/AT5G20690/AT2G47040/AT2G47030/AT3G09530	26
13	msh4_down	GO:0035838	growing cell tip	8/2591	18/25408	0.0001976	0.00843279	0.00843279	AT3G12160/AT5G28680/AT5G16500/AT1G03050/AT4G34940/AT3G02810/AT4G02650/AT5G20690	8
14	msh4_down	GO:0090404	pollen tube tip	8/2591	18/25408	0.0001976	0.00843279	0.00843279	AT3G12160/AT5G28680/AT5G16500/AT1G03050/AT4G34940/AT3G02810/AT4G02650/AT5G20690	8
15	msh4_down	GO:0000118	histone deacetylase complex	12/2591	37/25408	0.00019942	0.00843279	0.00843279	AT1G24230/AT1G27240/AT3G49830/AT1G23810/AT1G27260/AT1G24220/AT1G27250/AT5G35600/AT1G24250/AT1G70030/AT1G24200/AT1G27270	12
16	msh4_down	GO:0030427	site of polarized growth	8/2591	20/25408	0.00047195	0.0174621	0.0174621	AT3G12160/AT5G28680/AT5G16500/AT1G03050/AT4G34940/AT3G02810/AT4G02650/AT5G20690	8
17	msh4_down	GO:0051286	cell tip	8/2591	22/25408	0.0009945	0.0327079	0.0327079	AT3G12160/AT5G28680/AT5G16500/AT1G03050/AT4G34940/AT3G02810/AT4G02650/AT5G20690	8
