# Supplementary material for: Comparative transcriptomic analysis of thermally stressed Arabidopsis thaliana meiotic recombination mutants
Source: BMC Genomics. 2021 Mar 12;22:181. doi: 10.1186/s12864-021-07497-2 (PMC7953577; doi:10.1186/s12864-021-07497-2)
Supplement: Supplementary file 10 — Additional file 10 : Supplementary Data 3. Expression data from 148 genes with previously described meiotic functions in WT, mus81 and msh4 at 20 °C and 28 °C. [file 12864_2021_7497_MOESM10_ESM.xlsx]

## Sheet: 148 meiotic genes
Supplementary Data 3 Expression data from 148 genes with previously described meiotic functions in WT, mus81 and msh4 at 20°C and 28°C.
	Gene name	Alias	20col_2	20col_3	28col_1	28col_2	log2FoldChange	padj	20mus81_1	20mus81_2	28mus81_2	28mus81_4	log2FoldChange	padj	20msh4_2	20msh4_3	28msh4_1	28msh4_2	log2FoldChange	padj
	Entry into meiosis
	AT3G12280	ATRBR1	47.0486	47.6151	50.7419	59.4412	0.210292	0.106355	42.5596	39.0795	50.9564	50.5766	0.311238	0.0146082	45.6074	50.5671	62.7733	63.2038	0.33039	0.00753983
	AT2G32710	KRP4/ACK2	60.1948	42.4806	28.307	28.7086	-0.857006	0.00115392	46.9509	76.9065	28.5457	31.1208	-1.04997	6.07e-05	28.1001	27.102	30.9709	29.0819	0.0637359	0.876007
	AT3G19150	KRP6	21.6416	14.9885	16.3514	15.6723	-0.192243	0.507791	20.2198	24.0744	26.8839	20.6342	0.097389	0.781878	18.9302	18.8	11.6171	11.9316	-0.734571	0.00238558
	AT1G49620	KRP7	15.3293	13.6965	30.2485	38.1192	1.21464	2.36e-06	12.5884	17.0034	18.9358	26.1184	0.606491	0.0333414	14.7122	15.0194	50.5658	35.6987	1.41561	1.71e-08
	AT5G21150	AGO9	192.031	198.152	191.651	208.155	0.0280701	0.902517	206.416	184.401	241.119	183.176	0.112853	0.597017	192.885	226.947	161.693	155.464	-0.463512	0.00387438
	AT5G23570	SGS3	37.5687	39.6974	38.3225	44.2358	0.0849939	0.599228	34.3687	36.1012	31.2273	34.4893	-0.0944112	0.586484	33.461	35.8325	44.4584	43.3172	0.285213	0.0360506
	AT3G49500	RDR6	91.5417	82.5387	70.4709	79.136	-0.194521	0.080894	79.259	84.3176	85.6841	78.037	0.011198	0.954669	70.381	70.4549	73.427	77.1848	0.0581872	0.677038
	AT3G25100	CDC45	4.76467	7.60442	11.0002	13.7625	0.994099	0.000219071	4.61324	4.26122	7.19583	9.36262	0.900579	0.00127572	8.27758	9.31754	14.2548	15.4159	0.694631	0.0127173
	AT5G51330	SWI1	1.06616	1.88467	7.45704	8.81105	2.50624	2.61e-12	0.642425	0.775089	2.04069	2.53032	1.62734	4.43e-05	3.43411	3.06605	11.3832	7.81432	1.52445	2.99e-05
	AT1G77320	MEI1	13.2481	15.2608	15.2985	19.198	0.225975	0.255607	14.0988	11.0627	15.1212	12.6169	0.12496	0.60001	16.4665	16.5611	16.1339	15.8187	-0.0425236	0.876449
	AT5G48720	XRI1	35.939	39.2886	31.9938	32.7236	-0.194099	0.170972	34.8378	38.6395	37.2617	34.9805	-0.0355561	0.864072	34.2087	33.3285	37.9005	33.4343	0.0303301	0.880374
	AT1G64625	FST	1.42867	2.07528	2.39066	1.34122	0.0906948	0.892098	2.14207	1.59439	2.01881	1.83683	0.037689	0.966603	1.2991	2.18302	2.89005	2.32907	0.525609	0.33401
	DSB formation
	AT1G60460	MTOPVIB	3.19908	4.4981	5.37998	5.91462	0.550748	0.0480023	2.58897	3.05485	3.40793	4.23265	0.534777	0.0750909	4.28605	3.9114	5.4507	5.79705	0.396123	0.185489
	AT3G13170	SPO11-1	34.5235	36.7389	39.933	69.7141	0.533281	0.000103997	22.8182	20.493	29.0637	22.9213	0.191872	0.243029	31.2363	29.8406	84.5613	46.2112	0.271079	0.0689771
	AT1G63990	SPO11-2	1.219	2.34248	3.40159	2.86497	1.11162	0.0404162	1.85986	1.64978	1.61767	2.31791	0.452899	0.508004	2.26006	2.07394	3.4248	2.73618	0.702059	0.234631
	AT4G14180	PRD1	1.95948	3.88292	3.3589	4.35382	0.396979	0.308805	1.73876	1.25619	2.98372	3.0839	1.01112	0.00452371	3.7747	3.29163	4.27694	4.35898	0.229426	0.601002
	AT5G57880	PRD2/MPS1	92.217	90.2361	92.8049	121.463	0.289666	0.00975044	74.9999	76.3757	85.7172	87.7808	0.150969	0.240935	81.2453	84.8984	103.999	96.8665	0.243887	0.0340663
	AT1G01690	ATPRD3/PAIR1	14.9182	21.4211	23.0662	23.106	0.548648	0.0106873	17.372	15.3515	20.059	17.6813	0.191093	0.480252	22.2367	23.6043	26.261	27.9412	0.246826	0.311893
	At1g07060	DFO	9.46632	8.71537	19.1776	13.6633	1.02095	0.0216381	12.8006	5.10571	9.22148	5.00016	-0.447508	0.404921	11.9458	7.29812	10.1632	12.7493	0.200764	0.736059
	AT4G24710	PCH2	7.71207	12.0744	13.6218	13.6021	0.53944	0.0946243	7.70393	8.73767	7.74373	10.1667	0.178046	0.673933	11.5202	9.7016	17.7784	15.6841	0.549152	0.0921331
	AT1G10710	PHS1	3.22108	6.42621	12.8111	13.2704	1.44624	0.000651584	3.66602	1.74706	4.2461	5.11266	0.783151	0.104889	6.72631	7.24144	13.6956	12.3282	0.841027	0.0638402
	DSB repair
	AT3G02680	NBS1	46.5528	38.3682	28.3821	30.0241	-0.430077	0.00339175	40.8915	54.9533	28.9103	33.9619	-0.446383	0.00282424	32.9296	26.7557	29.4539	35.4865	-0.189951	0.255377
	AT5G54260	MRE11	16.4821	15.9384	17.3913	18.7467	0.149368	0.257848	16.2142	15.8649	15.095	14.2881	-0.129367	0.374013	17.685	16.3906	18.9329	20.2893	0.144783	0.287239
	AT2G31970	RAD50	19.937	22.4885	26.8548	35.7608	0.551673	0.000869617	18.9225	17.0032	26.8685	26.9691	0.580357	0.000552514	21.5603	23.5303	33.309	31.2362	0.461348	0.00632387
	AT3G52115	COM1/SAE2/GR1	3.52223	5.75629	9.62613	11.3194	1.1746	1.17e-06	5.5262	5.03011	8.12458	8.26434	0.629993	0.0169254	6.0046	6.58661	12.6799	13.5875	0.996075	3.77e-05
	AT1G54690	HTA3	66.0452	106.406	195.296	216.865	1.25398	8.55e-08	99.9705	78.1252	118.48	138.006	0.524283	0.0462483	126.875	127.504	287.086	278.176	1.09427	2.6e-06
	AT1G08880	HTA5	112.697	178.895	246.379	287.648	0.868983	0.000514526	176.506	136.348	152.541	191.654	0.137251	0.699062	215.282	199.805	343.159	372.709	0.726882	0.00423614
	AT3G48190	ATM	12.4774	12.5642	8.8681	11.2958	-0.321323	0.041486	10.7611	12.9834	9.53511	8.58252	-0.390143	0.0137492	10.322	9.99458	11.8385	13.1383	0.261742	0.111128
	AT5G40820	ATR	3.02099	3.65118	3.44053	4.05526	0.16046	0.464852	2.57444	2.58522	2.54441	2.85251	0.063004	0.824555	2.79337	3.4033	3.98554	3.89332	0.293779	0.147933
	AT4G24690	BRCA1	205.224	180.506	144.067	158.933	-0.356314	0.00471489	167.758	192.245	161.892	147.753	-0.220278	0.112974	144.764	142.859	136.482	140.408	-0.113199	0.456382
	AT4G00020	BRCA2A	7.64249	12.0596	16.0324	18.2837	0.796297	0.000383159	7.97928	6.97705	10.8446	10.3026	0.50403	0.0388909	13.3661	14.406	18.4631	21.7428	0.478224	0.0444665
	AT5G01630	BRCA2B	44.2846	74.0575	92.2032	76.4992	0.362307	0.0660484	62.9117	68.7671	75.0689	97.3247	0.194227	0.399146	78.6221	86.3689	115.821	95.6938	0.219822	0.307846
	AT1G64750	DSS1I	222.226	216.206	243.458	211.531	0.0525163	0.8504	251.486	261.468	189.071	248.684	-0.208267	0.396107	231.432	235.106	297.965	256.891	0.205565	0.382983
	AT3G09660	MCM8	5.36593	6.19714	8.52688	7.94968	0.510083	0.0148239	5.61981	4.68103	6.3039	6.33719	0.291783	0.225527	6.48662	5.21122	9.78844	10.0118	0.69651	0.000609009
	AT2G06510	RPA1A	34.9144	34.6334	37.807	41.732	0.186785	0.0767179	28.7275	28.0009	38.6337	36.6574	0.401653	5.51e-05	32.4777	33.9438	35.7441	37.342	0.0795871	0.525531
	AT5G45400	RPA1C/RPA70C	17.8099	20.2936	20.3776	24.5221	0.229094	0.120021	16.7894	15.348	24.8675	24.545	0.617171	4.14e-06	19.6249	19.2912	17.1643	17.965	-0.206149	0.177634
	AT5G20850	RAD51	11.8306	16.1163	19.1481	20.7372	0.51112	0.0106938	12.4155	12.8341	16.791	18.9659	0.503515	0.0152682	14.1686	15.5584	20.2031	20.0301	0.379108	0.0725946
	AT2G45280	RAD51C	24.5606	31.6516	30.1484	43.9213	0.61061	0.0018406	21.9682	21.4178	31.2718	38.3917	0.754546	0.000109888	26.6077	29.3228	43.6496	38.3249	0.410666	0.0464416
	AT2G28560	ATRAD51B	5.3111	5.3683	4.29362	4.60765	-0.230186	0.620002	5.57144	4.94254	4.50916	3.2111	-0.432207	0.333561	6.11117	3.71823	3.55218	2.41825	-0.763118	0.0535973
	AT1G07745	ATRAD51D	12.1418	13.4019	12.896	12.6757	0.130763	0.56241	10.9029	13.6833	12.9027	9.80421	-0.158171	0.505642	12.0856	10.1679	12.8541	11.0263	0.193962	0.372677
	AT5G57450	XRCC3	28.7738	31.6304	28.6768	33.5267	-0.124905	0.476897	42.6389	33.2927	31.436	26.7109	-0.415859	0.00616443	32.2455	33.9604	25.8074	38.5218	-0.193551	0.245046
	AT1G08260	POL2A	11.0216	13.2248	15.258	18.1929	0.452641	0.0092548	12.5291	10.2463	12.4977	12.0531	0.110043	0.637885	11.8158	12.4751	19.7549	20.212	0.675842	4.49e-05
	AT5G67100	ICU2/POLA1	22.1423	26.5925	28.3895	34.7757	0.361738	0.0800688	19.3874	15.8225	27.3731	25.2752	0.509563	0.0122777	22.0153	24.3344	34.9413	35.3398	0.488554	0.0145277
	AT5G63960	EMB2780/POLD1	12.7032	20.2333	25.8178	31.1453	0.784276	0.000468501	14.6049	13.3126	19.1221	20.7092	0.512779	0.0341946	18.4931	17.5359	29.4064	32.4309	0.721284	0.00135617
	AT5G22010	AtRFC1	623.869	1090.85	200.647	389.613	-1.10758	2.62e-08	679.904	714.378	1209.93	314.927	-0.444554	0.0472177	1049.86	1145.53	253.149	103.263	-1.59378	6.99e-17
	AT2G33640	AtPAT21	8.72577	9.86928	10.318	10.4036	0.151287	0.511947	8.44598	7.2497	8.81144	10.2924	0.282698	0.201483	10.316	9.29594	12.2576	12.0168	0.250008	0.249085
	AT3G23890	TOPII	41.2045	68.6425	75.5962	88.8159	0.578116	0.03579	47.7138	38.3283	51.7648	68.8356	0.492365	0.0915863	68.1594	65.4585	93.6575	96.9015	0.453117	0.114724
	AT5G57160	LIG4	18.551	19.9539	17.0031	17.193	-0.109041	0.487285	18.3082	18.8072	13.6455	14.4371	-0.249055	0.0838599	13.8414	16.0223	17.9762	20.2386	0.26346	0.0584796
	Meiotic recombination
	AT3G22880	DMC1	29.7146	46.5425	80.8701	90.3541	1.17289	3.45e-05	31.0187	20.4615	56.3543	76.939	1.3684	1.2e-06	51.2306	49.2539	105.547	103.538	1.00088	0.000438462
	AT3G27120	FIGL1	8.21112	10.7228	15.1964	16.8218	0.75856	0.000137443	6.60746	6.80268	8.69387	9.9363	0.475763	0.0298508	9.15237	9.4253	16.9249	14.327	0.694556	0.000542008
	AT1G04650	FLIP	8.41321	9.78188	9.82485	10.5305	0.164963	0.36862	8.65613	9.55861	7.2248	7.25345	-0.317922	0.068381	7.71587	8.90116	11.9081	11.3001	0.450424	0.00516815
	AT1G14750	SDS/CYCB3;1	5.57065	8.42396	16.2225	17.0091	1.26622	9.76e-06	3.25425	2.65977	6.69522	8.63069	1.3743	2.7e-06	8.40849	7.64506	18.9399	16.5515	1.11635	9.74e-05
	AT1G13330	HOP2/AHP2	13.1538	16.5241	22.0353	24.8611	0.65277	0.00327131	13.7581	10.6511	16.9172	19.7781	0.586024	0.0118504	16.4254	15.9101	26.611	27.1381	0.674726	0.00233494
	AT4G29170	MND1	70.6639	75.8142	84.5295	75.8783	0.113441	0.469649	70.7999	67.844	66.7089	88.3293	0.18874	0.214402	78.9562	73.3547	78.1551	77.6692	0.036811	0.852674
	AT5G64520	ATXRCC2	16.0676	14.9565	13.4341	14.8914	-0.04615	0.843895	11.5858	12.0039	16.2169	11.7122	0.192675	0.348497	10.6734	12.1018	11.7485	12.0055	-0.0791686	0.736633
	CO and NCO outcome balancing
	AT1G35530	FANCM	5.80367	6.53242	6.14311	7.05344	0.0907603	0.677776	5.06674	5.68733	6.50953	5.19614	0.116441	0.612888	5.68305	6.4786	6.13	6.03848	-0.0556726	0.824205
	AT5G63540	RMI1/BLAP75	1.93129	2.81416	4.10827	4.02448	0.769606	0.016984	2.12414	1.93762	2.43179	2.8537	0.383413	0.319506	2.8024	3.52759	5.57634	4.11563	0.560524	0.0985303
	AT5G63920	TOP3A	23.9282	29.4475	20.7079	24.7818	-0.355937	0.0184436	40.2901	36.6824	18.2343	16.1116	-1.37461	2.66e-24	26.9268	27.7998	26.2989	26.0774	-0.215233	0.189538
	AT1G10930	RECQ4A	105.095	100.215	109.13	116.795	0.196969	0.0788474	91.1563	87.221	127.227	113.655	0.42843	4.21e-05	92.4749	97.437	105.322	106.094	0.139333	0.246294
	AT1G60930	RECQ4B	4.88796	6.74334	9.14322	10.2043	0.730713	0.000699301	3.43713	3.37412	5.3201	6.55703	0.790121	0.000368218	6.58397	5.85668	10.3703	10.2543	0.672686	0.00196834
	AT5G63370	CDKG1	144.019	106.326	160.672	164.946	0.00155337	0.989715	150.34	134.131	133.607	199.027	0.155366	0.0678657	140.63	113.499	144.486	124.476	0.111437	0.202381
	AT5G50930	MHF1	5.68773	6.12413	6.21857	6.33018	0.104968	0.616103	5.19588	5.56797	6.96223	6.23135	0.285611	0.129356	5.44976	5.26659	6.80734	6.05734	0.223505	0.24488
	AT1G78790	MHF2	96.9344	98.288	76.9678	71.7009	0.0108531	0.943844	80.2104	92.72	67.8188	71.3925	0.0705432	0.61956	83.1484	95.7428	78.5554	83.8203	-0.263694	0.0147563
	AT3G18524	MSH2	16.6227	18.5822	17.4845	19.5509	0.06657	0.680393	16.2925	16.0691	15.368	13.8897	-0.149635	0.325572	17.6899	15.9897	20.8712	21.2068	0.262864	0.0476829
	AT3G33520	ARP6	55.0682	55.3836	42.05	48.5863	-0.29285	0.0172573	46.0041	51.1858	49.5175	46.381	-0.0218756	0.914902	49.3298	45.8827	40.7451	44.2374	-0.223836	0.0845867
	Control of CO distribution
	AT1G05180	AXR1	41.4195	41.0709	44.1204	48.2724	0.15681	0.237514	38.3545	43.4453	37.0246	38.4612	-0.116183	0.43923	39.1495	37.6596	49.2437	48.5988	0.29253	0.0175504
	AT3G63480	AtPSS1	11.3443	16.3242	21.513	24.2342	0.72119	0.00111235	8.83186	7.94835	14.992	15.8052	0.880455	8.05e-05	12.2555	10.4909	22.6668	20.3353	0.860722	7.47e-05
	AT3G02980	MCC1	1.26959	1.78971	2.20481	2.68366	0.650653	0.221562	1.74253	1.89838	1.5754	2.75133	0.274558	0.680796	1.53697	2.94124	2.97745	4.25919	0.616814	0.25432
	Class I CO pathway regulators
	AT4G17380	MSH4	10.6324	13.1277	12.6667	14.1223	0.164245	0.537542	7.75202	7.08115	8.84335	10.6171	0.392619	0.109593	9.23655	9.99613	35.273	47.8332	2.16707	4.39e-28
	AT3G20475	MSH5	22.806	27.8226	22.385	27.2604	-0.0315244	0.904039	16.1944	13.6505	21.1614	22.4286	0.544138	0.00364608	25.4891	22.6411	18.0961	18.1236	-0.466646	0.0122768
	AT5G48390	ZIP4	108.222	88.4293	99.3381	97.37	-0.231786	0.0508542	93.5048	98.8096	84.0594	95.7758	-0.197895	0.117521	88.6229	93.6007	76.8951	110.568	-0.0096165	0.966507
	AT3G27730	RCK/MER3	5.35735	8.88942	6.83602	8.9496	0.150297	0.690346	3.45284	2.94144	5.12476	5.52219	0.760904	0.0134287	8.46789	6.10412	8.71575	8.52507	0.191761	0.608902
	AT1G12790	PTD	100.702	129.3	90.4581	89.5696	-0.428297	0.000324209	135.158	157.075	120.373	74.0452	-0.326514	0.00909237	119.846	109.018	81.1203	64.5561	-0.453577	0.000114193
	AT5G52290	SHOC1/ZIP2	1.45193	2.20189	2.76276	3.74296	0.823616	0.00433763	1.0925	1.10126	1.37616	1.75339	0.515246	0.117473	2.00571	1.81502	3.37804	3.4155	0.770997	0.00861283
	AT1G53490	HEI10	7.15423	9.37008	9.96262	11.0345	0.359395	0.038419	39.34	39.7283	41.9049	35.6774	-0.0404188	0.876906	7.66002	6.44054	11.7746	11.9875	0.574328	0.000581399
	AT4G09140	MLH1	28.4577	28.2614	26.5384	29.4316	0.0536518	0.719252	22.5276	22.4285	23.7056	22.8035	0.0802069	0.602195	25.4847	28.0364	27.5885	26.9054	-0.000996276	1
	AT4G35520	MLH3	7.45913	9.09074	8.68137	9.73289	0.132581	0.627009	7.47773	6.55849	10.9157	8.26002	0.518931	0.0239078	9.73683	10.0659	5.93892	7.06569	-0.60459	0.00605161
	AT1G63770	MPA1	109.973	122.902	149.473	132.394	0.155268	0.24757	107.049	105.248	108.933	125.541	0.196248	0.147122	116.754	125.017	211.327	142.655	0.101559	0.491659
	Class II CO pathway regulators
	AT4G30870	MUS81	25.1153	26.4093	27.3529	33.1176	0.222633	0.162741	4.95461	6.01095	5.47049	5.33813	-0.00405357	0.991433	22.9231	22.257	18.8036	20.8813	-0.250041	0.119553
	AT4G30872	ANTI-MUS81	0.145892	0.692844	1.18267	0.460352	0.970046	0.704789	0.261198	0	0.014467	0	-1.83942	0.604656	0.458717	0.653366	0.084542	1.93572	0.63001	0.826047
	AT2G21800	EME1A	4.89433	6.23929	8.20996	7.94013	0.530839	0.0226205	5.17124	6.26301	7.72891	6.19892	0.294498	0.274228	5.14608	6.04869	9.16267	10.1243	0.724306	0.00138996
	AT2G22140	EME1B	3.46423	4.66392	6.60251	6.14063	0.644867	0.0137207	4.22948	3.31094	3.24581	3.55405	-0.153194	0.673872	4.09273	3.80199	6.3579	5.96077	0.584165	0.0306021
	AT4G14970	FANCD2	15.8541	22.4185	22.6454	24.9194	0.368287	0.00766845	32.2413	36.9326	21.6261	21.6661	0.182993	0.254616	18.5879	15.4745	26.2167	22.0256	0.524239	7.59e-05
	SC structure
	AT3G48750	CDKA;1	87.6318	86.4002	88.8137	92.8345	0.0585805	0.64581	85.5719	88.0358	86.9298	84.5925	-0.00308767	0.98903	72.6134	72.3095	97.8396	95.1884	0.356819	0.00029811
	AT1G67370	ASY1	5.82327	14.8668	29.9328	29.8267	1.53098	2.25e-05	2.47856	2.76964	10.9749	12.1642	2.2	8.46e-10	12.7626	14.0375	27.6786	25.2507	0.930143	0.014252
	AT1G67365	anti-ASY1	11.9605	8.85535	7.62864	12.0877	-0.0926873	0.828699	10.0021	10.013	11.6264	9.65603	0.0821468	0.870673	7.57384	5.91958	6.66047	7.82953	0.038732	0.945924
	AT4G32200	ASY2	10.022	9.3411	24.9196	31.1897	1.19464	1.4e-12	8.61207	7.26243	20.9925	32.0644	1.80829	5.1e-28	12.2377	13.1372	25.841	23.4938	0.715095	4.31e-05
	AT2G46980	ASY3	8.46767	17.4154	26.8462	30.2109	1.14038	0.000401296	11.4528	7.72044	15.4267	17.6084	0.777244	0.0244859	18.4265	18.4946	31.7493	33.7681	0.771444	0.0219051
	AT2G33793	ASY4	35.9196	55.0008	64.093	72.8787	0.56207	0.127246	31.7855	23.3538	32.9524	58.4709	0.732175	0.0466473	50.3504	38.9517	61.5727	68.0151	0.50326	0.184922
	AT1G22260	ZYP1A	15.7843	20.3132	15.8365	20.0167	-0.0165579	0.963969	9.64479	7.32171	10.0604	12.5963	0.411575	0.152639	17.7494	13.8253	15.7629	15.9812	-0.0539834	0.892351
	AT1G22275	ZYP1B	14.9705	18.446	14.1378	15.5347	-0.184085	0.348825	9.37463	9.74718	12.0687	11.6712	0.294556	0.127162	13.009	10.5783	11.3488	10.9636	-0.138213	0.519044
	Chromatin structure
	AT3G54670	SMC1	51.3762	51.4572	47.6298	54.7304	-0.0546537	0.699394	46.8405	53.7469	47.5748	51.4287	0.0917441	0.515037	43.8109	43.5099	52.5991	54.9222	0.217954	0.0591649
	AT2G27170	SMC3	31.4055	38.6316	38.0054	40.4602	0.161359	0.359642	34.044	29.8954	30.9747	31.5586	-0.0259595	0.920542	31.195	35.097	42.2343	45.4007	0.35485	0.0245768
	AT2G47980	SCC3	81.011	100.545	93.558	101.286	0.0983092	0.361715	83.039	74.5691	89.2771	85.2678	0.0955526	0.406297	81.8392	91.3961	98.5477	105.988	0.0928816	0.402273
	AT5G05490	SYN1/REC8	4.18815	5.15605	13.6318	14.2302	1.57001	1.95e-08	2.49424	2.37999	5.63204	4.95033	1.11049	0.000230493	4.59587	5.40438	19.7606	11.7241	1.60268	6.5e-09
	AT5G40840	SYN2	9.76015	14.2243	15.7725	17.5837	0.473902	0.0730357	11.0902	8.27401	12.6088	15.9342	0.55917	0.0368493	15.7186	15.7088	17.1985	18.3686	0.119553	0.7254
	AT3G59550	SYN3	25.6206	26.3617	21.4391	23.4828	-0.217196	0.28337	23.5388	25.7175	25.8617	18.5548	-0.156693	0.497131	25.8465	22.2172	18.7024	20.8114	-0.342577	0.074354
	AT5G15540	SCC2	19.5492	21.7334	20.5137	24.6901	0.123038	0.369888	17.1266	16.9246	21.2122	20.1355	0.268492	0.0337976	17.5405	18.312	21.6412	23.033	0.252659	0.0426879
	AT1G51130	NSE4A	32.6901	34.1496	28.8073	34.3287	-0.0904698	0.683921	27.2597	33.4858	32.9922	28.9691	0.0258689	0.931687	26.3413	24.4617	22.6128	28.2226	-0.0611064	0.808076
	AT3G20760	NSE4B	5.30643	4.57143	1.64645	1.52835	-1.61693	8.34e-05	4.47037	5.19526	4.27154	2.46868	-0.528868	0.281724	4.62097	3.67384	0.288758	0.751347	-3.05509	4.23e-14
	AT5G62410	CAP-E1/SMC4	18.8636	25.0046	31.6624	40.1013	0.702778	0.000977031	20.8509	15.417	30.0461	28.3901	0.681967	0.0017759	27.0159	30.43	36.6577	40.365	0.364136	0.117119
	AT3G47460	CAP-E2/SMC2	10.4824	14.0588	13.7905	14.8539	0.195152	0.343936	14.3466	13.4725	11.5397	11.2241	-0.292729	0.148096	12.5035	14.0337	16.467	18.0082	0.306648	0.1149
	AT5G03470	PP2AB′α	16.2414	15.1868	14.4784	18.9698	0.0791584	0.7111	14.3623	16.1158	15.508	15.8324	0.0391766	0.884784	12.637	12.9912	17.2672	17.5937	0.385665	0.024153
	AT3G09880	PP2AB′β	58.5689	84.847	43.6943	48.9852	-0.278169	0.0090403	75.831	51.1705	41.9019	47.4612	-0.349344	0.000999378	61.238	49.7686	64.7363	52.2089	0.0188173	0.912326
	AT4G31400	CTF7/ECO1	29.9428	27.1012	22.7917	21.5035	-0.282253	0.0777055	24.902	28.9469	27.8393	23.6045	-0.034459	0.889995	23.503	22.8996	21.8015	20.8386	-0.282532	0.0819902
	AT1G11060	AtWAPL1	20.589	18.3887	17.868	18.2039	-0.118502	0.513272	17.3753	19.3156	17.4618	14.2224	-0.217933	0.208871	14.5102	15.3448	17.2845	19.1798	0.228257	0.171425
	AT1G61030	AtWAPL2	68.3914	66.8181	40.4118	49.8396	-0.59221	0.000956601	45.3162	49.9529	54.6033	38.8177	-0.0355669	0.906882	49.666	47.5946	23.806	27.6372	-0.978426	8.2e-09
	AT3G10440	SGO1	12.6619	16.4213	13.3438	14.838	-0.0536796	0.849096	15.9943	14.0415	11.8225	9.00044	-0.537996	0.0112446	12.2504	12.4873	13.5595	12.5571	0.0220438	0.953437
	AT3G14190	PANS1	59.4124	75.136	82.4955	86.3701	0.319674	0.0879247	65.702	53.7028	84.0642	71.5179	0.374528	0.0485986	76.1336	70.3122	67.2016	70.7974	-0.150209	0.48764
	AT4G22970	ESP	3.368	6.16655	7.14289	8.55034	0.716548	0.011947	3.48961	3.14192	4.72169	5.73803	0.657298	0.0273357	5.43814	5.85324	9.87246	10.4445	0.78769	0.00526747
	AT1G01370	CENH3	38.0472	41.9846	34.2936	30.1572	-0.0102184	0.954944	53.3757	46.9503	46.3125	42.9054	-0.413868	0.0010765	37.2124	39.9807	56.1877	41.3472	0.523904	1.4e-05
	Cell cycle control
	AT1G77390	TAM/CYCA1;2	29.4713	30.5413	24.806	27.4579	-0.206098	0.17269	22.058	23.5783	23.7428	24.0604	0.0656827	0.743502	24.1836	23.1185	22.3918	19.7771	-0.220784	0.151893
	AT4G20900	MS5/TDM	88.515	87.0648	50.7774	52.5468	-0.565054	0.0159825	78.1835	78.2227	93.3151	56.8678	0.0193896	0.965001	63.556	76.2731	28.1797	32.9835	-1.03676	2.06e-06
	AT3G57860	OSD1	43.2237	43.9624	44.4243	60.7571	0.259732	0.296083	28.3237	27.0289	31.6926	43.1214	0.437229	0.0682166	38.4805	37.9265	45.1965	41.5305	0.126035	0.664288
	AT5G19400	SMG7	60.1974	64.2809	55.9528	67.6768	-0.0129072	0.946497	51.6496	47.2933	60.9808	53.0262	0.208575	0.161649	53.7956	57.9325	56.9828	56.9089	-0.0275895	0.89392
	AT3G06030	ANP3	98.7152	146.59	148.889	144.631	0.295302	0.0667785	124.04	141.238	159.044	159.999	0.0348461	0.889995	142.802	166.294	148.912	170.506	0.111431	0.562537
	AT1G75950	ASK1	485.476	453.923	280.451	301.442	-0.0591024	0.652125	340.218	332.228	423.642	489.298	0.0202731	0.906581	367.966	331.372	425.815	443.877	-0.261142	0.012932
	AT5G42190	ASK2	131.962	135.953	134.076	133.873	-0.00459055	0.977585	136.541	144.627	136.977	148.252	0.0204539	0.917483	127.623	132.48	146.702	162.219	0.188763	0.135571
	AT4G33270	CDC20.1	85.191	108.956	105.6	97.5399	0.200514	0.321387	104.302	82.5762	108.182	94.7666	0.0678255	0.796771	105.239	109.245	116.283	106.577	-0.0762868	0.756806
	AT3G48150	APC8	9.23974	11.3014	13.8966	14.7941	0.474033	0.00276223	9.58859	9.17462	14.2645	13.3718	0.552995	0.000556233	11.3858	12.2784	15.99	18.3116	0.466532	0.00333289
	AT3G25980	MAD2	24.6095	43.2048	71.6116	67.2486	1.02947	0.000101049	41.9055	32.7533	43.3358	48.9885	0.300256	0.360651	50.9974	49.9117	84.8849	85.0482	0.69464	0.0115883
	AT5G56580	MKK6	91.6571	97.054	98.4606	106.918	0.115965	0.588784	79.009	80.9605	125.181	91.1645	0.427557	0.0183115	88.3337	84.452	47.6679	60.0745	-0.743174	7.47e-06
	AT1G66170	MMD1	25.6086	24.3991	20.0581	28.289	-0.0608218	0.802014	15.7787	14.908	20.7376	19.7704	0.396349	0.039074	18.8002	17.187	12.5425	13.291	-0.537709	0.00295454
	AT4G01370	MPK4	30.9967	30.8972	32.299	31.9814	0.0498061	0.764278	27.9975	32.5872	31.7056	28.0044	-0.0241987	0.908523	28.0441	30.3589	32.5138	33.624	0.121117	0.417696
	AT3G43210	STD	27.8532	31.3372	31.0328	35.7533	0.160304	0.250639	23.233	22.9834	33.9097	29.2642	0.439348	0.000489632	26.7866	26.3983	23.7203	26.5064	-0.147293	0.310438
	AT4G02460	PMS1/MLH2	288.027	321.857	395.252	383.439	0.326465	0.0329147	277.87	271.705	293.382	361.377	0.288114	0.0737003	350.363	367.215	446.926	388.52	0.171197	0.315071
	AT1G27720	TAF4B	2277.09	25.0036	21.2152	19.4491	-5.94604	0.000137377	16.4298	17.7523	17.5251	14.3497	-0.121106	0.968763	21.5791	17.1634	9.64413	12.8923	-0.786038	0.713544
	AT3G10650	NUP1	87.4237	99.5233	105.637	113.471	0.10071	0.347695	95.9635	91.5718	118.262	108.73	0.326401	0.000492787	107.444	100.037	92.9268	94.9059	-0.082279	0.468714
	AT5G04990	AtSUN1	70.6147	73.3649	67.0639	63.3687	-0.166528	0.101848	61.7169	61.227	63.04	56.4267	-0.0530897	0.690857	71.1526	71.2973	60.9474	69.094	-0.27131	0.00487579
	AT3G10730	AtSUN2	56.7266	55.9321	42.7232	42.1726	-0.7257	0.00021839	42.9755	52.7242	46.386	36.452	-0.271931	0.241693	45.7066	35.9745	40.518	41.4511	-0.397386	0.0599419
	Spindle formation
	AT1G34355	PS1	9.99713	16.6287	18.6847	22.1202	0.611289	0.0579599	7.44619	6.66981	10.178	16.2587	0.899961	0.00443139	14.8998	12.5782	24.5191	22.0731	0.702353	0.0276031
	AT1G06660	JASON	65.2837	74.7776	67.0673	68.3657	-0.0527393	0.729482	51.4942	50.728	70.1464	66.7084	0.417522	0.000330527	68.217	67.4278	46.8876	53.5582	-0.493677	9.46e-06
	AT4G21270	ATK1	12.4253	20.5185	24.9035	29.5865	0.721958	0.0203336	16.8746	10.7692	17.4834	22.7227	0.538792	0.109532	20.8829	20.231	33.3894	35.1582	0.678371	0.0314085
	AT4G05190	ATK5	18.0456	29.1948	31.0907	35.9464	0.511	0.0144732	21.416	19.6305	30.3583	30.1021	0.623639	0.00290262	30.878	27.0551	34.7851	37.763	0.218892	0.36182
	Chromosome condensation
	AT4G11080	3xHMG-box1/2	43.7649	55.7449	60.1335	61.3811	0.220356	0.207069	50.097	39.9767	51.8699	55.9722	0.156235	0.429408	50.1338	51.4558	60.2762	59.4247	0.148618	0.43552
	AT2G40030	DMS5/NRPE1	15.2061	18.2214	17.0826	22.2168	0.223536	0.272222	13.0182	12.4473	13.5974	13.9286	0.107851	0.667426	16.0625	15.2311	22.043	18.4837	0.315111	0.107634
	AT4G11130	RDR2	18.1659	57.0477	56.9899	48.0538	0.390413	0.000202466	44.4677	21.7236	61.3445	22.4544	0.292503	0.00831483	22.0132	39.1162	45.0107	36.0671	0.294848	0.00640361
	AT5G13960	SUVH4/KYP4	16.2845	20.8642	26.5421	28.2579	0.512198	0.00116199	17.107	16.4703	20.9108	19.8605	0.313783	0.0712212	23.2638	22.4277	33.0543	33.062	0.506989	0.00125901
	AT4G36290	ATMORC1	16.9575	21.2364	14.2578	19.7396	-0.0334793	0.859038	29.6293	18.8958	17.417	15.7354	-0.22405	0.139355	16.8455	16.5255	16.2647	18.794	0.309433	0.0273132
	AT2G27040	AGO4	94.7793	121.458	111.049	123.403	0.111827	0.552302	92.9177	81.2549	110.074	106.732	0.31171	0.0612662	96.1281	103.793	119.677	119.992	0.203697	0.241157
	AT3G43920	ATDCL3	43.7715	39.804	31.9639	36.1397	-0.305376	0.0322933	47.9965	48.7691	40.4083	33.6683	-0.370629	0.00939827	37.472	42.8729	31.1157	31.4554	-0.407934	0.00315016
	AT5G15380	DRM1	12.7788	12.5706	8.14322	8.92928	-0.608113	0.000441404	10.8676	10.644	10.5042	7.89178	-0.252759	0.214129	13.9447	14.1912	5.31789	5.64381	-1.42182	2.34e-18
	AT5G14620	DRM2	26.0817	21.8382	14.0424	17.7365	-0.607305	0.00307334	22.111	29.584	14.5352	14.9131	-0.811982	6.04e-05	15.2612	15.1802	17.9728	16.8158	0.139223	0.59595
	AT1G01040	DCL1	35.0992	33.9517	28.9424	36.0748	-0.113104	0.488045	29.0952	31.3018	40.4359	34.8519	0.322716	0.0243461	29.1982	32.3163	28.4105	29.5825	-0.130411	0.42281
	AT1G09700	HYL1	631.423	849.549	1001.44	955.528	0.37268	0.0459037	755.489	634.936	726.585	726.765	0.0730811	0.78103	850.406	868.476	1249.03	1047.49	0.310744	0.107814
	AT4G20910	HEN1	88.515	87.0648	50.7774	52.5468	-0.565054	0.0159825	78.1835	78.2227	93.3151	56.8678	0.0193896	0.965001	63.556	76.2731	28.1797	32.9835	-1.03676	2.06e-06
	AT1G48410	AGO1	234.049	240.759	224.764	264.151	0.0288416	0.861363	199.166	189.441	207.324	202.029	0.101793	0.500157	209.836	217.538	254.401	236.308	0.135936	0.316071
	AT3G05040	HST	20.1456	20.3785	21.0917	25.4387	0.195928	0.134209	18.1972	16.9679	20.0456	21.496	0.25884	0.0477733	20.5849	20.0862	21.1851	23.6356	0.0922259	0.544809
